# Supplementary material for: Leveraging diverse cell-death patterns in diagnosis of sepsis by integrating bioinformatics and machine learning
Source: PeerJ. 2025 Feb 26;13:e19077. doi: 10.7717/peerj.19077 (PMC11871900; doi:10.7717/peerj.19077)
Supplement: Supplemental Information 1 [file peerj-13-19077-s001.xlsx]

## Sheet: Table S1
Supplementary Table S1: List of programmed cell death-related genes.
No.	Apoptosis	Pyroptosis	Ferroptosis	Autophagy	Necroptosis	Cuproptosis	Parthanatos	Entotic cell death	Netotic cell death	Lysosome-dependent cell death	Alkaliptosis	Oxeiptosis	Disulfidptosis	Immunogenic cell death
1	AATF	BAKI	ABCCI	ABLI	GLUDI	FDX1	PARP	AMPK	ELANE	ABCA2	IKBKB	PGAM5	FLNA	RB1-DT
2	ABL1	BAX	ACACA	ABL2	GLUD2	LIAS	MIF	ATG5	MMPI	ABCB9	NFKBI	KEAPI	FLNB	HMGB1
3	ACAA2	CASP1	ACO1	ACER2	ALOX15	LIPT1	AIFMI	ATG7	MPO	ACP2	CA9	AIFM1	MYH9	STAT3
4	ACKR3	CASP3	ACSF2	ADRAIA	FTHI	DLD	HSP70	BECNI	CAMP	ACP5	CHUK	NRF2	TLN1	AGER
5	ACVRI	CASP4	ACSLI	ADRB2	PYG	DLAT	PAAN	CDC42	PADI4	ADGRE2	IKBKG	AIRE	DBN1	BCAP31
6	ACVRIB	CASP5	ACSL3	AKTI	CAPNI	PDHAI	ARH3	CDHI	EIPA	AGA	NFKBIA		ACTA1	CALR
7	ADORAI	CASP6	ACSL4	AMBRAI	CASPI	PDHB	RNF146	CTNNAI	NCX1	APIBI	RELA		ACTA2	EIF2S1
8	AEN	CASP8	ACSL5	ATF6	GLNA	MTFI	ADPRHL2	CYBB	MIA	APIGI			ACTB	IL5RA
9	AGT	CASP9	ACSL6	ATG101	BAX	GLS	OGG1	MYH14		APIM1			ACTBL2	SCARNA5
10	AGTR2	CHMP2A	AIFM2	ATG13	BCL2	CDKN2A		PI3KC3		APIM2			ACTC1	STING1
11	AIFMI	CHMP2B	AKRIC1	ATG14	FADD	GCSH		RHOA		APISI			ACTG1	APC
12	AKTI	CHMP3	AKRIC2	ATG2A	RIPKI	ATP7A		RNF146		APIS2			ACTG2	EPHB4
13	ANXA6	CHMP4A	AKRIC3	ATG2B	TNF	ATP7B		ROCK		APIS3			MYH10	MTIF2
14	APAF1	CHMP4B	ALOX12	ATG5	TNFRSFIA	SLC31A1		RUBCN		AP3BI			NCKAP1	HSP90AA1
15	APPLI	CHMP4C	ALOX15	ATG7	TRADD			UVRAG		AP3B2			RPN1	CXCR2
16	AR	CHMP6	ALOX5	ATM	TRAF2					AP3D1			SLC3A2	IL17RA
17	ARHGEF2	CHMP7	ATG5	ATP13A2	PPIA					AP3M1			SLC7A11	ERO1A
18	ARL6IP5	CYCS	ATG7	ATP6V0A1	CAPN2					AP3M2			WASF2	CCAT1
19	ARMC10	ELANE	ATP5MC3	ATP6V0A2	HSP90A					AP3S1			CYFIP1	PGR-AS1
20	ARRB2	GPX4	BACHI	ATP6V0B	ILIA					AP3S2			ABI2	CASP8
21	ASAH2	GSDMB	CARS	ATP6V0C	TNFSF6					AP4B1			BRK1	BAX
22	ATF3	GSDMC	CBS	ATP6V0D1	TNFRSF6					AP4E1			RAC1	BAK1
23	ATF4	GSDMD	CD44	ATP6V0D2	CASP8					AP4M1			GYS1	SLAMF7
24	ATM	GSDME	CHACI	ATP6V0E1	JNK					AP4S1			NDUFS1	TREM1
25	ATP2A1	GZMB	CISDI	ATP6V0E2	JAK2					ARF1			OXSM	LINC02605
26	ATP2A3	HMGBI	CP	ATP6V1A	CAMK2					ARL8B			LRPPRC	TRP-AGG2-6
27	ATP5IF1	IL18	CRYAB	ATP6V1B1	ILIB					ARSA			NDUFA11	XIST
28	AVP	ILIA	CS	ATP6V1B2	IFNG					ARSB			NUBPL	PCAT1
29	BAD	ILIB	CYBB	ATP6VICI	STAT3					ARSG			NDUFS2	CRMA
30	BAG3	IRF1	DPP4	ATP6V1C2	IRF9					ASAHI			CNOT1	LINC01150
31	BAG5	IRF2	EMC2	ATP6VID	TNFSF10					ATP10B			NDUFC1	KPNA2
32	BAG6	NLRC4	FADS2	ATP6V1E1	TNFRSF10A					ATP13A2			EPAS1	KCNQ1OT1
33	BAKI	NLRPI	FANCD2	ATP6V1E2	TNFRSF10B					ATP6API			PPM1F	MIR27A
34	BAX	NLRP2	FDFT1	ATP6VIGI	CFLAR					ATP6V0AI			NDUFA10	MIR34C
35	BBC3	NLRP3	FTH1	ATP6VIG2	XIAP					ATP6V0A2			SLC2A1	VTRNA2-1
36	BCAP31	NLRP6	FTL	ATP6VIH	BID					ATP6V0A4			SLC2A3	PWAR4
37	BCL10	NLRP7	FTMT	AUPI	AIFMI					ATP6V0B			TARDBP	TRG-GCC2-6
38	BCL2	NODI	G6PD	BAD	TRPM7					ATP6V0C			CHD4	TRG-CCC2-2
39	BCL2A1	PLCG1	GCLC	BAG3	IFNARI					ATP6V0DI			HNRNPU	TRG-TCC1-1
40	BCL2L1	PJVK	GCLM	BCL2	IFNAR2					ATP6V0D2			ATXN10	TRG-GCC3-1
41	BCL2L10	PRKACA	GLS2	BCL2L11	IFNGRI					ATP6V1H			GTF2I	CTSD
42	BCL2L11	PYCARD	GOTI	BECNI	IFNGR2					BLK			SART3	CASP3
43	BCL2L12	SCAF11	GPX4	BMF	TLR3					BLOCIS1			CAPZB	EIF2AK3
44	BCL2L14	TINAP	GSS	BNIP3	TIRP					BLOC1S2			ARMC6	EGR1
45	BCL2L2	TNF	HMGCR	BNIP3L	IFNA					BORCS5			CHCHD3	HSPA5
46	BCL3	TP53	HMOXI	BOK	IFNB					BORCS6			NLN	ATAD3A
47	BCLAF1	TP63	HSBP1	C9orf72	TRIF					BTK			HNRNPH1	MIR7-3HG
48	BDKRB2	AIM2	HSPB1	CALCOCO2	VDACI					C12orf4			MRPS17	TNF
49	BDNF	GSDMA	IREB2	CAMKK2	SLC25A4S					CBL			ANP32E	RIPK3
50	BECNI	IL6	KEAPI	CAPN1	PPID					CD164			PCBP2	CERNA3
51	BID	NOD2	LPCAT3	CAPNSI	CYLD					CD300A			PDLIM1	RIPK1
52	BIK	TIRAP	MAPILC3A	CASPI	RIPK3					CD63			PRC1	KARS1
53	BIRC6		MAPILC3B	CASP3	MLKL					CD68			ACTN4	LINC01672
54	BLOC1S2		MAPILC3C	CDC37	TRAF5					CD84			FLNB	CCL15-CCL14
55	BMF		MTIG	CDK5	TLR4					CHGA			IPO7	MTOR
56	BMP4		NCOA4	CDK5R1	RBCK1					CLN3			RNH1	ATR
57	BMP5		NFE2L2	CHMP4A	HMGB1					CLN5			FLNA	CDK4
58	BMPRIB		NFSI	CHMP4B	JAKI					CLNK			RPA1	PIK3CA
59	BNIP3		NOXI	CISD2	JAK3					CLTA			PML	ABCB1
60	BNIP3L		NOO1	CLEC16A	TYK2					CLTB			MYH9	AURKA
61	BOK		NRF2	CLN3	STATI					CLTC			MYH10	TLR4
62	BRCAI		OTUBI	CLU	STAT2					CLTCLI			IQGAP1	CDK6
63	BRCA2		PCBP1	CPTP	STAT4					CLU			HNRNPA3	ITGB2
64	BRSK2		PCBP2	CSNK2A2	STAT5A					CPLX2			HNRNPM	LDHA
65	BTK		PEBPI	CTSA	STAT5B					CTNS			RRP1	ITGA4
66	CAAPI		PGD	CTTN	STAT6					CTSA			MYL6	ABCA1
67	CASP1		PHKG2	DAP	H2A					CTSB			ACTB	PDCD1
68	CASP10		PRNP	DAPKI	TNFAIP3					CTSC			DSTN	PRKCZ
69	CASP12		PROM2	DAPK2	RNF31					CTSD			PRDX1	RIGI
70	CASP2		PTGS2	DAPK3	CHMP2A					CTSE			DHX9	BECN1
71	CASP3		RPL8	DAPLI	CHMP2B					CTSF			NSUN2	P2RX7
72	CASP4		SATI	DCN	VPS24					CTSG			SQSTM1	PRKCI
73	CASP5		SAT2	DDIT3	CHMP4A					CTSH			BOP1	SP1
74	CASP8		SLC11A2	DDRGK1	CHMP4B					CTSK			SAFB2	CD274
75	CASP8AP2		SLCIA5	DEPDC5	CHMP6					CTSL			TRIP6	TXN
76	CASP9		SLC39A14	DEPPI	VPS4					CTSO			DBN1	CD47
77	CAVI		SLC39A8	DHRSX	CHMPI					CTSS			INF2	CFLAR
78	CCAR2		SLC3A2	DNMIL	CHMP5					CTSV			SPART	CD209
79	CCK		SLC40A1	DRAMI	SMPDI					CTSW			IPO4	IFNA2
80	CD14		SLC7A11	DRAM2	PYCARD					CTSZ			UBASH3B	PDIA3
81	CD24		SQLE	EEF1AI	NLRP3					DEF8			GCN1	MLKL
82	CD27		STEAP3	EEF1A2	ZBPI					DNASE2			RUFY1	RALBP1
83	CD28		TF	EIF2AK4	IL33					DNASE2B			TNKS1BP1	SP3
84	CD38		TFRC	EIF4G1	FTL					ENTPD4			AAAS	UBE2T
85	CD3E		TP53	EIF4G2	SQSTMI					FAM98A			FANCI	ICAM3
86	CD44		VDAC2	ELAPORI	VDAC2					FER			SMPD4	USP18
87	CD5		VDAC3	EP300	VDAC3					FES			STRAP	AHRR
88	CD70		ZEB1	EPM2A	CHMP7					FGR			TLN1	TERC
89	CD74			ERCC4	PGAM5					FLCN			SAMM50	RMRP
90	CDIPI			ERNI	BIRC2					FOXF1			CD2AP	SMAD5-AS1
91	CDKNIA			EXOC1	BIRC3					FTHI			ZHX2	MIR193A
92	CDKN2D			EXOC4	EIF2AK2					FTL				SNHG16
93	CEBPB			EXOC7	PLA2G4					FUCAI				NBR2
94	CFLAR			EXOC8	DNMIL					GAA				CHKB-CPT1B
95	CHACI			FBXL2	SPATA2					GAB2				PCAT2
96	CHCHD10			FBXO7	FAF1					GALC				VLDLR-AS1
97	CHEK2			FBXW7	SHARPIN					GALNS				SOD2-OT1
98	CIBI			FEZI	NOX2					GATA2				VTRNA1-1
99	CIDEB			FEZ2	USP21					GBA				TRA-TGC7-1
100	CLU			FLCN	PARP1					GCC2				EIF2AK3-DT
101	COA8			FOXKI	CHMP4C					GGA1
102	COL2AI			FOXK2						GGA2
103	CRADD			FOXO1						GGA3
104	CREB3			FOXO3						GLA
105	CREB3L1			FTHI						GLBI
106	CRH			FTL						GM2A
107	CRIP1			FYCO1						GNPTAB
108	CSF2			FZD5						GNPTG
109	CSNK2A1			GAPDH						GNS
110	CSNK2A2			GATA4						GUSB
111	CTH			GBA						HDAC6
112	CTNNAI			GFAP						HEXA
113	CTSC			GNAI3						HEXB
114	CTTN			GOLGA2						HGS
115	CULI			GPR137						HGSNAT
116	CUL2			GPR137B						HMOXI
117	CUL3			GPSM1						HPS6
118	CUL4A			GSK3A						HSPA8
119	CUL5			GSK3B						HYALI
120	CX3CL1			HAXI						IDS
121	CX3CR1			HDAC6						IDUA
122	CXCL12			HERCI						IGF2R
123	CYLD			HGF						IL13
124	CYP1B1			HIFIA						IL13RA2
125	DAB2IP			HMGBI						ILA
126	DAP			HMOXI						ILAR
127	DAP3			HSP90AA1						KIFIB
128	DAPK1			HSPA8						KIT
129	DAPK2			HSPB1						KXDI
130	DAPK3			HSPB8						LAMPI
131	DAPLI			HTR2B						LAMP2
132	DAXX			HTRA2						LAMP3
133	DBH			HTT						LAMTORI
134	DCC			HUWEI						LAPTM4A
135	DDIAS			IF116						LAPTM4B
136	DDIT3			IFNG						LAPTM5
137	DDIT4			IKBKG						LAT
138	DDX3X			IL10						LAT2
139	DDX47			ILIORA						LGALS9
140	DDX5			IL4						LGMN
141	DEDD			IRGM						LIPA
142	DEDD2			ITPRI						LRRK2
143	DELEI			KAT5						LYN
144	DEPTOR			KAT8						M6PR
145	DIABLO			KDM4A						MAN2B1
146	DIDOI			KDR						MANBA
147	DNAJAI			KEAPI						MAPILC3A
148	DNAJC10			KIF25						MAP6
149	DNMIL			KLHL22						MCOLNI
150	DPF2			KLHL3						MFSD8
151	DYRK2			LACRT						MILRI
152	E2F1			LAMPI						MRGPRX2
153	E2F2			LAMP2						MT3
154	EDA2R			LAMP3						MYH9
155	EIF2AK3			LAMTORI						NAGA
156	ELL3			LAMTOR2						NAGLU
157	ENO1			LAMTOR3						NAGPA
158	EP300			LAMTOR4						NAPSA
159	EPHA2			LAMTOR5						NCOA4
160	EPO			LARPI						NDELI
161	ERBB3			LEP						NEDD4
162	ERCC6			LEPR						NEU1
163	ERNI			LGALS8						NPCI
164	ERN2			LRRK2						NPC2
165	EROIA			LRSAMI						NR4A3
166	ERP29			LZTSI						PDPKI
167	EYAI			MAPILC3A						PIK3C3
168	EYA2			MAPILC3B						PIK3CD
169	EYA3			MAPILC3C						PIK3CG
170	EYA4			MAP3K7						PIP4K2A
171	FADD			MAPK15						PIP4K2B
172	FAFI			MAPK3						PIP4P1
173	FAIM			MAPK8						PLA2G15
174	FAIM2			MAPT						PLA2G3
175	FAM162A			MCLI						PLEKHM1
176	FAS			MEFV						PLEKHM2
177	FASLG			MET						PPT1
178	FASTK			MFN2						PPT2
179	FBHI			MFSD8						PSAP
180	FBXW7			MID2						PSAPLI
181	FEMIB			MIR199A1						PTGDR
182	FGA			MIRLET7B						PTGDS
183	FGB			MLST8						RAB34
184	FGF10			MT3						RAB3A
185	FGFRI			MTCLI						RAB7A
186	FGFR3			MTDH						RAC2
187	FGG			MTMI						RUBCNL
188	FHIT			MTMR3						S100A13
189	FIGNLI			MTMR4						SCARB2
190	FISI			MTMR8						SGSH
191	FNIP2			MTMR9						SLC11A1
192	FXN			MTOR						SLC11A2
193	FYN			NCOA4						SLC17A5
194	FZD9			NEDD4						SMPDI
195	GOS2			NLRP6						SNAP23
196	GABARAP			NODI						SNAPIN
197	GATAI			NOD2						SNX16
198	GATA4			NPCI						SNX4
199	GCLM			NPRL2						SORLI
200	GDNF			NRBP2						SORTI
201	GFRAL			NUPRI						SPAG9
202	GGCT			OPTN						SPHK2
203	GHITM			ORMDL3						SQSTMI
204	GNAI2			OSBPL7						STXBP1
205	GNAI3			PAFAHIB2						STXBP2
206	GPERI			PARK7						SUMF1
207	GPX1			PHB2						SYK
208	GRINA			PHF23						SYTL4
209	GSDME			PIK3C2A						TCIRGI
210	GSK3A			PIK3C3						TFEB
211	GSK3B			PIK3CA						TMEM106B
212	GSKIP			PIK3CB						TPP1
213	GSTPI			PIK3R2						UNC13D
214	GZMB			PIM2						VAMP7
215	HDACI			PINK1						VAMP8
216	HERPUDI			PIP4K2A						VPS33A
217	HGF			PIP4K2B						VPS33B
218	HICI			PIP4K2C						VPS4A
219	HIFIA			PJVK						WASH3P
220	HINTI			PLEKHF1						ZFYVE16
221	HIP1			PLK2
222	HIPIR			PLK3
223	HIPKI			POLDIP2
224	HIPK2			PRKAAI
225	HMGB2			PRKAA2
226	HMOX1			PRKABI
227	HNRNPK			PRKAB2
228	HRAS			PRKACA
229	HRK			PRKAGI
230	HSPAIA			PRKAG2
231	HSPAIB			PRKAG3
232	HSPBI			PRKDI
233	HTRA2			PRKN
234	HTT			PSAP
235	HYAL2			PTPN22
236	HYOUI			PYCARD
237	ICAMI			QSOX1
238	IF116			RAB39B
239	IF127			RAB3GAPI
240	IF127L1			RAB3GAP2
241	IFI27L2			RAB7A
242	IF16			RAB8A
243	IFNBI			RALB
244	IFNG			RASIP1
245	IGF1			RB1CC1
246	IKBKE			RETREGI
247	IL12A			RETREG3
248	IL19			RHEB
249	ILIA			RIPK2
250	ILIB			RMCI
251	IL2			RNF152
252	IL20RA			RNF41
253	IL33			RNF5
254	ILA			ROCKI
255	IL6R			RPTOR
256	IL7			RRAGA
257	INCAI			RRAGB
258	ING2			RRAGC
259	ING5			RRAGD
260	INHBA			RUBCN
261	INHBB			RUFY4
262	INS			SCFDI
263	ITGA6			SCOC
264	ITGAM			SEC22B
265	ITGAV			SESNI
266	ITM2C			SESN2
267	ITPRI			SESN3
268	ITPRIP			SH3BP4
269	IVNSIABP			SH3GLBI
270	JAK2			SIRTI
271	JMY			SIRT2
272	JUN			SLC38A9
273	KDMIA			SMCR8
274	KITLG			SMGI
275	KRT18			SNCA
276	KRT8			SNRNP70
277	LCK			SNX32
278	LGALS12			SNX5
279	LGALS3			SNX6
280	LRRK2			SOGAI
281	LTBR			SOGA3
282	LY96			SPTLCI
283	MADD			SPTLC2
284	MAEL			SQSTMI
285	MAGEA3			SREBFI
286	MAP2K5			SREBF2
287	MAP3K5			STAT3
288	MAPK7			STBDI
289	MAPK8			STING1
290	MAPK8IPI			STK11
291	MAPK8IP2			STUBI
292	MAPK9			SUPT5H
293	MARCHF7			SVIP
294	MAZ			SYNPO2
295	MCLI			TAB2
296	MDM2			TAB3
297	MELK			TBCID14
298	MFF			TBCID25
299	MIF			TBK1
300	MIR132			TEX264
301	MIR15A			TFEB
302	MIR16-1			TICAMI
303	MIR17			TIGAR
304	MIR198			TLK2
305	MIR21			TMEM150A
306	MIR210			TMEM150B
307	MIR221			TMEM150C
308	MIR222			TMEM39A
309	MIR26B			TMEM39B
310	MIR27B			TMEM59
311	MIR449A			TOMM7
312	MKNK2			TP53
313	MLHI			TP53INP1
314	MLLTI1			TP53INP2
315	MMP9			TPCN1
316	MNT			TPCN2
317	MOAP1			TREM2
318	MPV17L			TRIB3
319	MSH2			TRIM13
320	MSH6			TRIM14
321	MSX1			TRIM21
322	MUCI			TRIM22
323	MULI			TRIM27
324	MYBBPIA			TRIM34
325	NACC2			TRIM38
326	NANOS3			TRIM5
327	NBN			TRIM6
328	NCK1			TRIM65
329	NCK2			TRIM68
330	NDUFA13			TRIM8
331	NDUFS3			TRIMLI
332	NFATC4			TRIML2
333	NFE2L2			TSCI
334	NGF			TSC2
335	NGFR			TSPO
336	NKX3-1			UBA5
337	NLEI			UBQLNI
338	NME5			UBQLN2
339	NMTI			UBQLN4
340	NOC2L			UCHLI
341	NOG			UFCI
342	NOL3			UFLI
343	NONO			UFM1
344	NOS3			ULKI
345	NOXI			USP10
346	NR4A2			USP13
347	NUPRI			USP30
348	OPAI			USP33
349	P2RX4			USP36
350	P2RX7			UVRAG
351	P4HB			VDACI
352	PAK2			VPS13C
353	PAK5			VPS13D
354	PARK7			VPS26A
355	PARPI			VPS26B
356	PARP2			VPS35
357	PAWR			WAC
358	PCGF2			WASHC1
359	PDCD10			WDFY3
360	PDCD5			WDR24
361	PDCD6			WDR41
362	PDIA3			WDR6
363	PDKI			WDR81
364	PDK2			WIPI2
365	PDPKI			ZC3H12A
366	PDX1			ZKSCAN3
367	PEA15			ZMPSTE24
368	PELI3
369	PERP
370	PF4
371	PHIP
372	PHLDA3
373	PIAS4
374	PIDDI
375	PIHIDI
376	PIK3R1
377	PINK1
378	PLAGL2
379	PLAUR
380	PLEKHF1
381	PLSCR3
382	PMAIPI
383	PML
384	POLB
385	POU4F1
386	POU4F2
387	PPARD
388	PPIA
389	PPIF
390	PPMIF
391	PPPICA
392	PPP1R13B
393	PPP1R15A
394	PPP2R1B
395	PPP3CC
396	PPP3R1
397	PRDX2
398	PRELIDI
399	PRKCA
400	PRKCD
401	PRKDC
402	PRKN
403	PRKRA
404	PRODH
405	PSEN1
406	PSMD10
407	PSME3
408	PTEN
409	PTGIS
410	PTH
411	PTPMT1
412	PTPNI
413	PTPN2
414	PTPRC
415	PTTGIIP
416	PYCARD
417	QARSI
418	RACKI
419	RAFI
420	RB1
421	RBICCI
422	RBCK1
423	RELA
424	RET
425	RFFL
426	RHOTI
427	RHOT2
428	RIPKI
429	RIPK3
430	RNF183
431	RNF186
432	RNF34
433	RNF41
434	RPLI1
435	RPL26
436	RPS27L
437	RPS3
438	RPS6KB1
439	RPS7
440	RRP8
441	RTKN2
442	RTL10
443	S100A8
444	S100A9
445	SCG2
446	SCN2A
447	SCRT2
448	SELENOK
449	SELENOS
450	SENP1
451	SEPTIN4
452	SERINC3
453	SERPINE1
454	SFN
455	SFPQ
456	SFRPI
457	SFRP2
458	SGMSI
459	SGPLI
460	SGPP1
461	SH3RF1
462	SHH
463	SHISA5
464	SIAHI
465	SIAH2
466	SIRTI
467	SIVAI
468	SKIL
469	SLC25A5
470	SLC35F6
471	SLC9A3R1
472	SMAD3
473	SNAII
474	SNAI2
475	SNW1
476	SODI
477	SOD2
478	SORT1
479	SP100
480	SRC
481	SRPX
482	SST
483	SSTR3
484	ST20
485	STK11
486	STK24
487	STK25
488	STK3
489	STK4
490	STRADB
491	STX4
492	STYXLI
493	SYVNI
494	TAF9
495	TAF9B
496	TCF7L2
497	TERT
498	TFDPI
499	TFDP2
500	TFPT
501	TGFB1
502	TGFB2
503	TGFBRI
504	THBS1
505	TICAMI
506	TICAM2
507	TIMM50
508	TIMP3
509	TLR3
510	TLR4
511	TM2D1
512	TMBIMI
513	TMBIM6
514	TMC8
515	TMEM102
516	TMEM109
517	TMEM117
518	TMEM14A
519	TMEM161A
520	TNF
521	TNFAIP3
522	TNFRSF10A
523	TNFRSF10B
524	TNFRSF10C
525	TNFRSF12A
526	TNFRSFIA
527	TNFRSFIB
528	TNFRSF25
529	TNFSF10
530	TNFSF12
531	TOPORS
532	TP53
533	TP53BP2
534	TP63
535	TP73
536	TPD52L1
537	TPT1
538	TRADD
539	TRAFI
540	TRAF2
541	TRAF7
542	TRAPI
543	TRIAPI
544	TRIB3
545	TRIM32
546	TRIM39
547	TXNDC12
548	TYROBP
549	UACA
550	UBB
551	UBE2K
552	UBE4B
553	UBQLNI
554	UMOD
555	UNC5B
556	URII
557	USP28
558	USP47
559	VDAC2
560	VNNI
561	WDR35
562	WNT4
563	WWOX
564	XBPI
565	YAPI
566	YBX3
567	YWHAB
568	YWHAE
569	YWHAG
570	YWHAH
571	YWHAQ
572	YWHAZ
573	ZC3HC1
574	ZDHHC3
575	ZMYND11
576	ZNF205
577	ZNF385A
578	ZNF385B
579	ZNF622
580	ZSWIM2

## Sheet: Table S2
Supplementary Table S2: List of differentially expressed programmed cell death-related genes.
	logFC	AveExpr	t	P.Value	adj.P.Val	B
ABCA1	0.65711	10.6996	5.62187	8.71e-08	2.43e-07	6.82572
ABCB1	-1.18929	7.52645	-15.229	1.79e-32	5.58e-31	63.1825
ABI2	-0.985555	9.33064	-13.9169	5.6e-29	1.17e-27	55.1677
ABL1	-0.56546	8.825	-10.6016	4.88e-20	3.95e-19	34.6845
ACKR3	-0.682813	7.54972	-7.9183	4.55e-13	1.97e-12	18.7762
ACO1	-0.530973	8.16137	-4.63469	7.6e-06	1.78e-05	2.49425
ACSL3	0.679513	10.5255	7.50641	4.65e-12	1.85e-11	16.4814
ACSL4	0.716472	11.7661	8.02007	2.54e-13	1.12e-12	19.3512
ADGRE2	0.533498	12.7157	5.60282	9.54e-08	2.66e-07	6.73675
AIM2	1.69256	10.3647	17.0467	3.31e-37	2e-35	74.04
ALOX15	-1.27392	7.15044	-8.41502	2.59e-14	1.24e-13	21.61
ALOX5	1.0599	13.4548	14.0951	1.86e-29	4.11e-28	56.263
AP3B2	2.37154	7.64819	12.2291	2e-24	2.47e-23	44.7332
AP3M2	-0.67746	8.62096	-10.2739	3.66e-19	2.72e-18	32.6816
AP3S1	0.698228	11.5032	15.3925	6.64e-33	2.21e-31	64.1721
ARRB2	0.589301	14.2256	12.0626	5.63e-24	6.68e-23	43.7014
ATF6	0.678578	11.2571	11.5162	1.69e-22	1.75e-21	40.3182
ATG2A	-0.561869	12.0073	-9.11113	4.24e-16	2.39e-15	25.6831
ATG5	0.534888	9.67808	7.9368	4.09e-13	1.78e-12	18.8805
ATM	-0.965924	11.6284	-9.94363	2.77e-18	1.9e-17	30.6743
ATP6V0B	0.550959	12.7871	11.1506	1.63e-21	1.54e-20	38.0603
ATP6V0E1	0.902895	14.1179	17.8202	3.55e-39	2.98e-37	78.5543
ATP6V0E2	-0.955728	10.0705	-13.4514	9.98e-28	1.83e-26	52.2991
ATP6V1E1	0.848218	12.1718	19.8856	2.78e-44	5.01e-42	90.2595
ATR	-0.592703	9.55281	-8.63791	7.02e-15	3.54e-14	22.9024
AURKA	0.933582	7.80372	7.56251	3.4e-12	1.36e-11	16.7907
BAD	0.567266	8.93723	11.6733	6.35e-23	6.87e-22	41.29
BAG3	-0.739709	8.16231	-6.19686	5.09e-09	1.57e-08	9.60138
BCL2	-0.687707	10.0849	-9.97671	2.26e-18	1.56e-17	30.8747
BCL2A1	2.69565	11.6415	20.7463	2.42e-46	6.07e-44	94.9797
BCL3	0.696679	12.2739	12.4723	4.39e-25	5.9e-24	46.2406
BID	0.583662	11.9528	10.2509	4.22e-19	3.11e-18	32.5412
BIK	0.710762	7.45079	11.2843	7.13e-22	6.95e-21	38.8856
BIRC3	-0.842127	9.83626	-8.60719	8.41e-15	4.22e-14	22.7236
BLK	-0.517862	8.93885	-7.24814	1.94e-11	7.36e-11	15.0712
BLOC1S2	0.979303	10.4363	15.8859	3.36e-34	1.34e-32	67.1435
BMF	-0.604525	9.64542	-8.00249	2.81e-13	1.24e-12	19.2516
BTK	0.520869	11.8721	10.662	3.36e-20	2.77e-19	35.0548
C9orf72	0.720774	11.5321	8.91132	1.39e-15	7.51e-15	24.5033
CAMKK2	0.637664	12.661	12.0694	5.4e-24	6.42e-23	43.7432
CAMP	1.51023	10.4209	11.9765	9.62e-24	1.12e-22	43.1677
CASP3	0.658054	9.77666	8.21004	8.52e-14	3.92e-13	20.4325
CASP4	0.740089	13.1956	13.2768	2.95e-27	5.06e-26	51.2205
CASP5	1.37231	8.9988	9.58272	2.48e-17	1.55e-16	28.4971
CD14	0.529206	13.2717	5.99654	1.39e-08	4.16e-08	8.61528
CD164	0.538252	13.5247	9.33751	1.09e-16	6.44e-16	27.0291
CD24	1.46005	11.1366	9.11953	4.03e-16	2.27e-15	25.7329
CD27	-1.20519	9.56721	-10.5066	8.76e-20	6.87e-19	34.1031
CD274	1.47037	9.91513	9.86176	4.56e-18	3.08e-17	30.1788
CD28	-1.63353	9.38577	-11.6228	8.7e-23	9.28e-22	40.9776
CD2AP	-0.506958	8.78852	-4.55865	1.05e-05	2.41e-05	2.18595
CD3E	-1.58967	10.6827	-14.123	1.57e-29	3.48e-28	56.4346
CD44	0.610676	14.3872	8.82079	2.38e-15	1.25e-14	23.9714
CD5	-1.61302	9.90011	-18.4613	8.74e-41	9.94e-39	82.2435
CD63	1.17135	14.4669	17.7198	6.38e-39	5.12e-37	77.9724
CD74	-1.05822	15.0445	-11.4699	2.25e-22	2.31e-21	40.0319
CD84	-0.623739	10.142	-8.12419	1.4e-13	6.32e-13	19.9426
CDK5	0.785757	8.3411	9.5265	3.49e-17	2.15e-16	28.1597
CDK6	-0.587494	9.45407	-10.5659	6.08e-20	4.86e-19	34.4657
CDKN2D	1.01883	11.3694	15.0584	5.06e-32	1.48e-30	62.1477
CEBPB	1.06461	14.4686	14.8087	2.33e-31	6.31e-30	60.6287
CHMP2A	0.544027	12.7052	10.6735	3.13e-20	2.59e-19	35.1256
CHMP2B	0.630236	11.3286	8.33216	4.2e-14	1.98e-13	21.1327
CHMP4B	0.548596	12.4487	11.1302	1.85e-21	1.74e-20	37.9346
CHMP4C	1.20104	5.04644	8.60421	8.56e-15	4.29e-14	22.7063
CHMP5	1.06346	10.7727	15.6453	1.43e-33	5.23e-32	65.6975
CHMP7	-0.632418	11.3378	-16.3544	2.02e-35	9.72e-34	69.9438
CHUK	0.850561	9.79001	8.06875	1.92e-13	8.58e-13	19.6273
CIDEB	0.553262	10.959	8.09607	1.64e-13	7.39e-13	19.7825
CISD2	0.613639	10.5684	6.45481	1.35e-09	4.4e-09	10.8994
CLTB	0.538919	10.9067	10.3596	2.16e-19	1.63e-18	33.2043
CLU	1.25305	11.8321	10.7807	1.61e-20	1.38e-19	35.7835
CRADD	0.616294	8.20305	12.0467	6.22e-24	7.35e-23	43.6025
CRIP1	-0.602673	10.3776	-6.18377	5.44e-09	1.68e-08	9.53635
CTSA	0.700153	12.6837	10.2346	4.66e-19	3.43e-18	32.4423
CTSB	0.623722	14.075	10.7141	2.44e-20	2.05e-19	35.3746
CTSC	0.699271	12.6302	9.63473	1.81e-17	1.15e-16	28.8096
CTSD	1.03964	12.9046	12.3511	9.34e-25	1.21e-23	45.489
CTSF	-0.6995	8.12269	-11.7863	3.14e-23	3.5e-22	41.9896
CTSG	1.33378	8.27086	5.39614	2.54e-07	6.81e-07	5.78424
CTSL	1.27083	9.60248	10.9118	7.18e-21	6.38e-20	36.5895
CTSO	-0.651256	9.09588	-7.8552	6.52e-13	2.79e-12	18.4211
CTSW	-1.31602	11.0874	-9.81312	6.13e-18	4.09e-17	29.8849
CX3CR1	-1.25348	11.7824	-8.72438	4.22e-15	2.17e-14	23.4069
CYBB	0.52856	13.791	8.23871	7.22e-14	3.34e-13	20.5965
CYP1B1	1.56251	12.2384	14.2753	6.14e-30	1.42e-28	57.369
DDIAS	1.31412	8.59512	15.0949	4.05e-32	1.2e-30	62.3691
DDIT3	0.815471	9.35365	11.8457	2.17e-23	2.45e-22	42.3576
DLD	0.689811	10.8049	11.6737	6.33e-23	6.85e-22	41.293
DPP4	-1.39035	9.17713	-13.6477	2.96e-28	5.76e-27	53.51
DYRK2	-1.41288	9.86318	-14.8885	1.43e-31	3.99e-30	61.1146
E2F1	0.719371	7.94313	8.81644	2.45e-15	1.28e-14	23.9459
E2F2	1.08605	10.7306	13.0352	1.32e-26	2.1e-25	49.7264
EIF2AK3	-0.785802	8.01098	-11.3872	3.76e-22	3.77e-21	39.5212
ELANE	1.65616	8.13599	7.90113	5.02e-13	2.16e-12	18.6795
EMC2	1.23039	8.86591	13.3768	1.58e-27	2.84e-26	51.8386
ENO1	0.630545	13.289	11.2868	7.02e-22	6.87e-21	38.901
EPAS1	1.18739	8.20037	9.33655	1.1e-16	6.47e-16	27.0234
EPHA2	-0.616438	5.31266	-8.28211	5.61e-14	2.62e-13	20.8452
EPHB4	-0.779959	9.62147	-7.19885	2.55e-11	9.55e-11	14.8048
EPM2A	-0.54333	7.86862	-8.29148	5.31e-14	2.49e-13	20.899
FADD	0.532692	11.3791	11.9511	1.13e-23	1.3e-22	43.0105
FAS	0.714957	11.2925	8.09954	1.61e-13	7.25e-13	19.8023
FASLG	-0.689665	7.30979	-7.75131	1.17e-12	4.91e-12	17.8393
FER	-0.576853	7.94867	-10.7223	2.32e-20	1.95e-19	35.4247
FES	1.1069	11.674	15.7166	9.33e-34	3.48e-32	66.1267
FGR	0.848734	14.5009	15.3096	1.1e-32	3.52e-31	63.6706
FHIT	-1.03478	7.86849	-8.95486	1.08e-15	5.87e-15	24.7597
FOXO1	-0.593894	10.4127	-10.3294	2.61e-19	1.95e-18	33.02
FXN	-0.600021	8.1259	-9.13079	3.77e-16	2.13e-15	25.7997
FYCO1	-0.677773	9.31736	-13.4436	1.05e-27	1.92e-26	52.2509
FYN	-1.06612	11.8976	-13.2546	3.38e-27	5.75e-26	51.0833
FZD5	0.858584	6.77567	10.5393	7.16e-20	5.68e-19	34.3032
G6PD	0.746358	11.6162	6.81719	2.01e-10	6.98e-10	12.7732
GALC	0.596869	10.5863	9.98944	2.09e-18	1.45e-17	30.9519
GAPDH	0.960936	15.3056	16.0336	1.38e-34	5.84e-33	68.0287
GATA2	-1.51545	8.88189	-10.9208	6.79e-21	6.06e-20	36.6449
GCLM	1.32222	9.42494	13.5197	6.53e-28	1.23e-26	52.7208
GCN1	-0.96729	11.1065	-20.818	1.64e-46	4.26e-44	95.3684
GGA2	-0.804017	11.467	-13.8282	9.68e-29	1.97e-27	54.6223
GLA	0.782067	10.9538	15.7522	7.53e-34	2.83e-32	66.3403
GLS2	-0.896424	6.37811	-11.9204	1.36e-23	1.57e-22	42.8204
GM2A	0.878385	12.2124	11.2179	1.08e-21	1.03e-20	38.4759
GNAI3	0.793935	12.7223	18.1848	4.3e-40	4.15e-38	80.6585
GNS	0.831974	13.0278	12.4767	4.27e-25	5.76e-24	46.2678
GRINA	1.30686	11.5799	16.1716	6.04e-35	2.75e-33	68.8535
GSDMB	-0.657628	9.76034	-7.7032	1.54e-12	6.38e-12	17.571
GSKIP	1.17955	9.48493	9.75543	8.7e-18	5.7e-17	29.5367
GTF2I	-0.881011	10.1866	-15.1708	2.55e-32	7.82e-31	62.8296
GZMB	-1.0879	10.5715	-6.29579	3.07e-09	9.69e-09	10.0956
HGF	1.73257	9.13938	12.4363	5.49e-25	7.31e-24	46.017
HIP1	0.745293	10.9149	6.72762	3.23e-10	1.11e-09	12.3048
HMGB2	1.81112	12.5067	21.468	4.88e-48	1.72e-45	98.8643
HNRNPH1	-0.591747	13.5902	-13.9186	5.54e-29	1.16e-27	55.1783
HSBP1	1.20117	11.3255	18.0106	1.18e-39	1.03e-37	79.6551
HYAL2	0.890003	8.17092	12.5576	2.58e-25	3.55e-24	46.7691
IFI27L2	0.858284	9.10027	15.5087	3.28e-33	1.14e-31	64.874
IFNGR2	0.784763	13.0285	14.6178	7.49e-31	1.94e-29	59.4641
IL10	0.976896	4.78723	11.2642	8.08e-22	7.82e-21	38.7614
IL18	0.758874	7.66033	9.05872	5.79e-16	3.24e-15	25.3729
IL5RA	-1.56612	7.41954	-14.9357	1.07e-31	3.02e-30	61.402
INHBA	1.99194	6.37496	9.39859	7.55e-17	4.52e-16	27.3939
ITGA4	-1.10474	10.7134	-12.2473	1.78e-24	2.23e-23	44.8457
ITGA6	-0.817723	10.1243	-10.3588	2.18e-19	1.64e-18	33.1992
ITGAM	0.928435	13.9549	15.3551	8.33e-33	2.72e-31	63.9457
JAK2	0.970909	10.9823	12.1326	3.64e-24	4.42e-23	44.1353
JAK3	0.827282	13.9974	13.3348	2.06e-27	3.61e-26	51.5789
JMY	-0.942632	8.73679	-12.9964	1.68e-26	2.64e-25	49.4865
KIT	-0.691143	6.29928	-8.82117	2.38e-15	1.25e-14	23.9737
KLHL22	-0.71255	10.7052	-13.247	3.55e-27	6.02e-26	51.0363
KLHL3	-1.72131	7.6082	-20.989	6.47e-47	1.77e-44	96.2934
LAMTOR2	0.704318	10.5006	12.3375	1.02e-24	1.31e-23	45.4047
LAMTOR3	1.01037	10.4483	13.2118	4.41e-27	7.42e-26	50.819
LAMTOR5	1.3065	12.306	18.344	1.72e-40	1.84e-38	81.5725
LAPTM4A	0.66674	13.0891	13.3555	1.81e-27	3.21e-26	51.7071
LAT	-1.45599	9.805	-14.5316	1.27e-30	3.21e-29	58.9377
LAT2	0.74722	12.9447	15.8576	3.99e-34	1.55e-32	66.9735
LCK	-1.44171	11.0372	-14.7468	3.4e-31	9.12e-30	60.2517
LDHA	1.52708	13.6393	19.4119	3.94e-43	5.87e-41	87.6216
LGALS3	0.664182	12.3908	8.01725	2.58e-13	1.14e-12	19.3352
LRPPRC	-0.707031	9.77905	-9.5095	3.86e-17	2.38e-16	28.0577
LTBR	0.536158	10.7809	9.8791	4.1e-18	2.78e-17	30.2837
LY96	1.79895	10.5918	17.2953	7.65e-38	5.14e-36	75.4983
MADD	-0.558694	10.6738	-11.8187	2.57e-23	2.88e-22	42.1906
MAPK3	0.59698	10.966	7.74755	1.2e-12	5.01e-12	17.8184
MAPK8	-0.548144	10.2991	-13.5825	4.43e-28	8.46e-27	53.1081
MELK	0.717186	5.86106	6.87133	1.5e-10	5.29e-10	13.0579
MFF	0.875739	11.1104	18.847	9.64e-42	1.28e-39	84.4393
MID2	-0.897483	6.2446	-13.5298	6.14e-28	1.16e-26	52.7829
MLKL	0.81802	11.9024	12.4762	4.28e-25	5.78e-24	46.2642
MMP9	2.44441	13.3924	16.0655	1.14e-34	4.88e-33	68.2194
MPO	1.46123	8.87044	7.41303	7.82e-12	3.06e-11	15.9688
MSH2	-0.541424	8.58922	-8.57984	9.87e-15	4.92e-14	22.5646
MYL6	1.17842	15.0555	19.7055	7.6e-44	1.25e-41	89.2597
NBN	0.600627	11.7153	9.08511	4.95e-16	2.78e-15	25.5291
NEDD4	1.40005	8.40521	13.1773	5.47e-27	9.08e-26	50.6058
NEU1	0.639701	10.5424	12.7038	1.04e-25	1.51e-24	47.6746
NFKBIA	0.830303	13.1138	13.8699	7.49e-29	1.55e-27	54.8785
NKX3-1	-0.968929	6.98119	-6.61631	5.82e-10	1.95e-09	11.7275
NLRC4	1.89078	11.7759	23.5558	8.73e-53	8.38e-50	109.728
NOG	-2.13621	7.00638	-16.1602	6.46e-35	2.94e-33	68.7855
NOL3	0.832629	8.08373	12.0071	7.95e-24	9.33e-23	43.3574
OSBPL7	-0.89482	8.65893	-13.9854	3.67e-29	7.8e-28	55.5892
PADI4	1.41993	12.3035	13.2692	3.09e-27	5.28e-26	51.1734
PARP1	-0.630431	10.7979	-12.5657	2.45e-25	3.39e-24	46.819
PDCD10	1.14513	10.6733	15.7768	6.49e-34	2.45e-32	66.4885
PEA15	-0.625395	11.4672	-9.0165	7.45e-16	4.13e-15	25.1234
PERP	-0.715895	6.89861	-7.35989	1.05e-11	4.06e-11	15.6784
PF4	0.60398	11.9091	4.56682	1.01e-05	2.34e-05	2.2189
PGD	1.53472	13.6071	21.0475	4.71e-47	1.36e-44	96.6091
PIK3CB	0.577584	12.0765	12.9372	2.43e-26	3.74e-25	49.12
PIK3R1	-0.50748	11.056	-12.2289	2e-24	2.48e-23	44.7315
PLCG1	-1.42517	10.7088	-16.8084	1.35e-36	7.36e-35	72.6361
PLEKHF1	-0.895424	9.02603	-12.5395	2.89e-25	3.96e-24	46.657
PPARD	-0.636841	9.72465	-11.4008	3.46e-22	3.48e-21	39.6052
PPP1R13B	-1.11936	8.50732	-18.4696	8.33e-41	9.67e-39	82.2912
PPP3CC	-0.8483	9.83986	-15.0724	4.65e-32	1.37e-30	62.2326
PRC1	0.815389	7.81884	6.54665	8.39e-10	2.77e-09	11.3689
PRKCA	-0.580986	9.29541	-6.2126	4.7e-09	1.46e-08	9.67968
PRKCD	0.636235	12.7778	12.0867	4.84e-24	5.8e-23	43.8504
PRKDC	-0.929272	10.5329	-8.55622	1.13e-14	5.62e-14	22.4274
PTGDR	-1.35086	9.08143	-13.4798	8.37e-28	1.55e-26	52.4743
PTGDS	-0.876839	7.69685	-7.96117	3.56e-13	1.56e-12	19.018
PTGS2	-0.557785	9.69676	-5.19855	6.33e-07	1.64e-06	4.89645
PTPN2	0.546681	11.2825	11.3411	5.01e-22	4.94e-21	39.2362
PTPN22	0.682897	10.5857	7.68695	1.69e-12	6.97e-12	17.4806
PYCARD	0.640987	12.7383	11.3453	4.88e-22	4.82e-21	39.2622
QSOX1	1.16115	12.2333	17.3291	6.27e-38	4.26e-36	75.6961
RALB	0.84487	12.7612	14.4547	2.04e-30	5e-29	58.4671
RIPK3	0.738334	10.0093	12.9849	1.81e-26	2.82e-25	49.4154
RNF146	0.793082	11.9875	12.2032	2.34e-24	2.89e-23	44.5727
RPA1	-0.683924	10.6358	-10.5154	8.3e-20	6.52e-19	34.1568
RPS27L	0.751621	9.69236	8.37496	3.27e-14	1.56e-13	21.379
RPS7	0.901713	12.0247	9.46523	5.05e-17	3.08e-16	27.7925
RPTOR	-0.777615	9.02858	-12.1798	2.71e-24	3.34e-23	44.4274
RRAGA	0.562945	11.2992	16.8256	1.22e-36	6.72e-35	72.7372
RRAGD	0.856334	10.9517	14.3639	3.56e-30	8.4e-29	57.9119
S100A8	2.46839	15.6416	24.6512	3.51e-55	5.51e-52	115.208
S100A9	2.22766	16.4546	28.0885	2.67e-62	2.31e-58	131.457
SART3	-0.607943	11.1975	-14.2537	7.02e-30	1.61e-28	57.2361
SELENOK	0.842719	10.6861	11.6074	9.57e-23	1.01e-21	40.8826
SEPTIN4	0.637683	7.15389	5.3998	2.5e-07	6.7e-07	5.80088
SESN2	0.585355	9.99815	8.05882	2.04e-13	9.07e-13	19.5709
SIAH2	0.913625	11.8823	9.0111	7.7e-16	4.26e-15	25.0915
SKIL	0.697864	10.3605	9.30368	1.34e-16	7.81e-16	26.8274
SLC11A1	0.968953	13.8946	11.1182	2e-21	1.86e-20	37.8605
SLC2A3	1.26332	14.2664	19.4122	3.93e-43	5.87e-41	87.6229
SLC39A14	-0.592711	7.28717	-7.82122	7.91e-13	3.35e-12	18.2305
SLC39A8	0.837079	9.80014	7.99599	2.92e-13	1.28e-12	19.2148
SLC40A1	1.06516	12.0736	12.9964	1.68e-26	2.64e-25	49.4866
SLC7A11	0.618651	6.72702	6.392	1.87e-09	6.01e-09	10.5805
SMAD3	-1.04838	11.0089	-17.8142	3.68e-39	3.07e-37	78.5197
SNAPIN	0.533198	10.113	10.9201	6.82e-21	6.07e-20	36.6408
SNX16	0.693758	7.86429	7.8397	7.12e-13	3.03e-12	18.3342
SNX32	0.620015	9.28571	7.99363	2.96e-13	1.3e-12	19.2015
SNX4	0.598487	9.76657	9.34575	1.04e-16	6.14e-16	27.0783
SNX6	0.602065	11.1817	7.91393	4.67e-13	2.02e-12	18.7515
SORT1	1.56366	11.8787	17.5603	1.62e-38	1.19e-36	77.0454
SPTLC2	0.69868	12.2415	11.3876	3.75e-22	3.76e-21	39.5238
ST20	0.640579	10.5583	7.76736	1.07e-12	4.5e-12	17.929
STAT4	-1.18759	10.1235	-12.0419	6.4e-24	7.56e-23	43.573
STEAP3	0.701188	8.05356	6.68738	4e-10	1.36e-09	12.0955
STK3	1.25714	9.16897	12.781	6.42e-26	9.47e-25	48.1528
STXBP1	-0.570172	6.57074	-8.78861	2.88e-15	1.51e-14	23.7827
STXBP2	1.18308	12.6317	14.2906	5.59e-30	1.3e-28	57.4626
SUMF1	0.796949	10.5059	11.2811	7.27e-22	7.08e-21	38.8657
TBK1	0.532968	10.5675	8.74177	3.8e-15	1.96e-14	23.5086
TFRC	0.535824	10.4599	5.22572	5.59e-07	1.46e-06	5.01717
THBS1	0.975127	9.74408	6.88187	1.42e-10	5.01e-10	13.1134
TLR3	-0.611071	5.53846	-8.58937	9.33e-15	4.66e-14	22.62
TLR4	0.724941	12.3331	8.86039	1.89e-15	1e-14	24.2039
TMC8	-0.830447	12.6468	-14.7417	3.51e-31	9.36e-30	60.2206
TMEM109	-0.738846	10.426	-17.2512	9.91e-38	6.51e-36	75.24
TMEM14A	-0.710593	7.30939	-8.47434	1.83e-14	8.91e-14	21.9528
TMEM59	0.863741	12.85	20.5422	7.4e-46	1.66e-43	93.8687
TNFRSF12A	0.655155	8.18544	11.6099	9.42e-23	1e-21	40.8982
TNFRSF25	-1.25488	9.88414	-14.8185	2.19e-31	5.96e-30	60.6884
TNFSF10	0.742918	12.8879	11.0601	2.86e-21	2.64e-20	37.5024
TP53	-0.978237	10.9081	-13.6646	2.66e-28	5.2e-27	53.6142
TP53INP2	-0.693019	9.98416	-10.133	8.69e-19	6.25e-18	31.8238
TPCN1	-0.734267	9.85543	-12.5741	2.33e-25	3.24e-24	46.871
TPT1	0.593537	15.4428	10.9363	6.16e-21	5.52e-20	36.7405
TRAF5	-1.3084	9.74506	-14.6926	4.74e-31	1.25e-29	59.9207
TRIM22	0.538397	13.5518	6.54878	8.29e-10	2.74e-09	11.3798
TRIM32	-0.95798	7.50747	-15.4681	4.2e-33	1.44e-31	64.6285
TRIM6	0.837186	6.23212	6.79867	2.22e-10	7.68e-10	12.676
TRIM68	-0.570034	8.83993	-10.104	1.04e-18	7.42e-18	31.6473
TRIP6	0.52848	8.7876	10.2288	4.83e-19	3.55e-18	32.4068
TSPO	1.58526	13.7406	18.5503	5.25e-41	6.3e-39	82.7519
TXN	1.83047	11.8325	27.1015	2.57e-60	1.36e-56	126.934
TXNDC12	0.571512	11.3953	15.6711	1.23e-33	4.51e-32	65.8528
TYROBP	0.616675	15.0381	11.0158	3.77e-21	3.43e-20	37.2297
UBQLN4	-0.703965	10.1851	-13.5355	5.93e-28	1.12e-26	52.8183
USP13	-0.717506	7.89444	-9.3783	8.53e-17	5.08e-16	27.2726
USP28	-1.10051	9.5263	-13.8632	7.8e-29	1.61e-27	54.8374
USP36	-1.01841	9.57806	-17.4076	3.95e-38	2.78e-36	76.155
VAMP7	0.820353	10.483	11.0858	2.44e-21	2.26e-20	37.661
VPS13C	-0.582951	11.7642	-11.237	9.56e-22	9.18e-21	38.5936
WDFY3	0.883168	11.7132	11.4397	2.72e-22	2.77e-21	39.8452
WDR41	0.586049	10.5626	10.7769	1.65e-20	1.41e-19	35.7604
WDR6	-0.647973	12.4963	-14.2669	6.47e-30	1.49e-28	57.3174
WDR81	-0.602357	10.3179	-11.9437	1.18e-23	1.36e-22	42.9646
YWHAH	0.578763	11.7321	10.3647	2.1e-19	1.59e-18	33.2357
ZC3H12A	0.66626	9.84917	9.1242	3.92e-16	2.22e-15	25.7606
ZDHHC3	0.9503	11.576	17.0561	3.13e-37	1.9e-35	74.0955
ZFYVE16	0.537421	10.8582	6.18337	5.45e-09	1.68e-08	9.53434
ZHX2	-0.589781	11.1349	-12.5598	2.55e-25	3.51e-24	46.7823
ZMPSTE24	0.555608	11.5995	11.4123	3.22e-22	3.26e-21	39.6764
ZMYND11	-0.91772	9.6744	-13.7468	1.6e-28	3.19e-27	54.1206

## Sheet: Table S3
Supplementary Table S3: List of marker genes selected by 3 machine learning algorithms.
SVM-RFE	Random Forest	Lasso Regression
S100A9	TXN	TXN
NLRC4	LDHA	S100A9
LDHA	NLRC4	TRIP6
SORT1	S100A9	CHMP5
PGD	GCN1	E2F2
TXN	S100A8	GALNS
MAPK8	HMGB2	CLU
LAMTOR5	KLHL3	AIM2
BCLAF1	SORT1	EPAS1
GNAI3	PGD	NLRC4
SLC2A3	CD63	EPHA2
EPHA2	TMEM59	IL7
CD63		KLHL3
RRAGA		IL5RA
S100A8		BCLAF1
TMEM109		MAPK8
TP53INP2		TP53INP2
MLKL
TRIM32
ITGAM
SLC9A3R1
EPAS1
DBN1
GCN1
NCOA4
CTSA
HSBP1
IDS

## Sheet: Table S4 
Supplementary Table S4: Analysis of the prediction model in the validation set.
	AUC	Sensitivity	Specificity	PPV	NPV
GSE28750	1	1	1	1	1
GSE57065	0.999	1	0.964	1	0.902
GSE13904	0.989	1	0.919	1	0.75
GSE26378	0.995	1	0.939	0.976	0.904
GSE26440	0.986	1	0.918	0.959	0.903

## Sheet: Table S5
Supplementary Table S5: Cutoff values for marker genes.
	AUC	Best Youden's index	Sensitivity	Specificity	Cutoff
NLRC4	0.989	0.973	0.984	0.989	3.6
S100A9	0.999	0.989	1	0.989	4.096
TXN	0.999	0.989	1	0.989	3.644
