# Supplementary material for: Leveraging diverse cell-death patterns in diagnosis of sepsis by integrating bioinformatics and machine learning
Source: PeerJ. 2025 Feb 26;13:e19077. doi: 10.7717/peerj.19077 (PMC11871900; doi:10.7717/peerj.19077)
Supplement: Supplemental Information 3 [file peerj-13-19077-s003.xls]

## Sheet: Sheet1
ITEM TO CHECK	IMPORTANCE	CHECKLIST
EXPERIMENTAL DESIGN
Definition of experimental and control groups	E	Line148-149
Number within each group	E	Line148-149
Assay carried out by core lab or investigator's lab?	D
Acknowledgement of authors' contributions	D	Line341-342
SAMPLE
Description	E	Line148-149
Volume/mass of sample processed	D	Line148-149
Microdissection or macrodissection	E	Line149
Processing procedure	E	Line148-150
If frozen - how and how quickly?	E	Line148-150
If fixed - with what, how quickly?	E	Line148-150
Sample storage conditions and duration (especially for FFPE samples)	E	Line151
NUCLEIC ACID EXTRACTION
Procedure and/or instrumentation	E	Line150
Name of kit and details of any modifications	E	Line150
Source of additional reagents used	D
Details of DNase or RNAse treatment	E	Line151-153
Contamination assessment (DNA or RNA)	E	Line154-155
Nucleic acid quantification	E	Line154-155
Instrument and method	E	Line154-155
Purity (A260/A280)	D	Line154-155
Yield	D
RNA integrity method/instrument	E	Line154-155
RIN/RQI or Cq of 3' and 5' transcripts	E	Line154-155
Electrophoresis traces	D
Inhibition testing (Cq dilutions, spike or other)	E	Line154-155
REVERSE TRANSCRIPTION
Complete reaction conditions	E	Line155-160
Amount of RNA and reaction volume	E	Line156
Priming oligonucleotide (if using GSP) and concentration	E	Line157
Reverse transcriptase and concentration	E	Line156-157
Temperature and time	E	Line159-160
Manufacturer of reagents and catalogue numbers	D
Cqs with and without RT	D*
Storage conditions of cDNA	D
qPCR TARGET INFORMATION
If multiplex, efficiency and LOD of each assay.	E	Line175-187
Sequence accession number	E	Line175-187
Location of amplicon	D
Amplicon length	E	Line175-187
In silico specificity screen (BLAST, etc)	E	Line175-187
Pseudogenes, retropseudogenes or other homologs?	D
Sequence alignment	D
Secondary structure analysis of amplicon	D
Location of each primer by exon or intron (if applicable)	E	Line175-187
What splice variants are targeted?	E	Line175-187
qPCR OLIGONUCLEOTIDES
Primer sequences	E	Line175-187
RTPrimerDB Identification Number	D
Probe sequences	D**
Location and identity of any modifications	E	Line175-187
Manufacturer of oligonucleotides	D
Purification method	D
qPCR PROTOCOL
Complete reaction conditions	E	Line160-166
Reaction volume and amount of cDNA/DNA	E	Line165-166
Primer, (probe), Mg++ and dNTP concentrations	E	Line165-166
Polymerase identity and concentration	E	Line165-166
Buffer/kit identity and manufacturer	E	Line161-162
Exact chemical constitution of the buffer	D
Additives (SYBR Green I, DMSO, etc.)	E	Line161-162
Manufacturer of plates/tubes and catalog number	D
Complete thermocycling parameters	E	Line163-165
Reaction setup (manual/robotic)	D
Manufacturer of qPCR instrument	E	Line161-162
qPCR VALIDATION
Evidence of optimisation (from gradients)	D
Specificity (gel, sequence, melt, or digest)	E	Line167-168
For SYBR Green I, Cq of the NTC	E	Line166-167
Standard curves with slope and y-intercept	E	Line169-170
PCR efficiency calculated from slope	E	Line169-170
Confidence interval for PCR efficiency or standard error	D
r2 of standard curve	E	Line169-170
Linear dynamic range	E	Line169-170
Cq variation at lower limit	E	Line169-170
Confidence intervals throughout range	D
Evidence for limit of detection	E	Line169-170
If multiplex, efficiency and LOD of each assay.	E	Line169-170
DATA ANALYSIS
qPCR analysis program (source, version)	E	Line161-162
Cq method determination	E	Line161-162
Outlier identification and disposition	E	Line161-162
Results of NTCs	E	Line161-162
Justification of number and choice of reference genes	E	Line167
Description of normalisation method	E	Line167-168
Number and concordance of biological replicates	D
Number and stage (RT or qPCR) of technical replicates	E	Line168
Repeatability (intra-assay variation)	E	Line168
Reproducibility (inter-assay variation, %CV)	D
Power analysis	D
Statistical methods for result significance	E	Line167-168
Software (source, version)	E	Line161-162
Cq or raw data submission using RDML	D
Table 1. MIQE checklist for authors, reviewers and editors. All essential information (E) must be submitted with the manuscript. Desirable
information (D) should be submitted if available. If using primers obtained from RTPrimerDB, information on qPCR target, oligonucleotides,
protocols and validation is available from that source.
*: Assessing the absence of DNA using a no RT assay is essential when first extracting RNA. Once the sample has been validated as
RDNA-free, inclusion of a no-RT control is desirable, but no longer essential.
**: Disclosure of the probe sequence is highly desirable and strongly encouraged. However, since not all commercial pre-designed assay
vendors provide this information, it cannot be an essential requirement. Use of such assays is advised against.
