# Supplementary material for: Leveraging diverse cell-death patterns in diagnosis of sepsis by integrating bioinformatics and machine learning
Source: PeerJ. 2025 Feb 26;13:e19077. doi: 10.7717/peerj.19077 (PMC11871900; doi:10.7717/peerj.19077)
Supplement: Supplemental Information 4 [file peerj-13-19077-s004.xlsx]

## Sheet: Sheet1
Block Type	96alum
Chemistry	SYBR_GREEN
Experiment File Name	C:\Users\fangyalan\Desktop\1111\5800n1.eds
Instrument Type	sds7500
Passive Reference
Well	Target Name	Sample Name	Task	Reporter	Quencher	Cт	Cт Mean	Cт SD	Quantity	Quantity Mean	Quantity SD	Automatic Ct Threshold	Ct Threshold	Automatic Baseline	Baseline Start	Baseline End	Tm1	Tm2	Comments	HIGHSD	EXPFAIL
D1	5800 ACTB	Sample 1	UNKNOWN	SYBR	None	28.7456	28.5964	0.132738				TRUE	188928	TRUE	3	19	80.3107			N	N
E1	5800 ACTB	Sample 1	UNKNOWN	SYBR	None	28.4914	28.5964	0.132738				TRUE	188928	TRUE	3	17	80.3107			N	N
F1	5800 ACTB	Sample 1	UNKNOWN	SYBR	None	28.5523	28.5964	0.132738				TRUE	188928	TRUE	3	19	80.0618			N	N
D11	5800-1 NLRC4	Sample 1	UNKNOWN	SYBR	None	Undetermined	36.1314	0.663816				TRUE	167874	TRUE	3	43	62.8908			N	Y
G1	5800-1 NLRC4	Sample 1	UNKNOWN	SYBR	None	36.6008	36.1314	0.663816				TRUE	167874	TRUE	3	27	83.7947			Y	N
H1	5800-1 NLRC4	Sample 1	UNKNOWN	SYBR	None	35.662	36.1314	0.663816				TRUE	167874	TRUE	3	23	83.7947			Y	N
D10	5800 ACTB	Sample 10	UNKNOWN	SYBR	None	20.3191	20.289	0.0472924				TRUE	188928	TRUE	3	7	80.3107			N	N
E10	5800 ACTB	Sample 10	UNKNOWN	SYBR	None	20.3135	20.289	0.0472924				TRUE	188928	TRUE	3	15	80.3107			N	N
F10	5800 ACTB	Sample 10	UNKNOWN	SYBR	None	20.2345	20.289	0.0472924				TRUE	188928	TRUE	3	15	80.3107			N	N
G10	5800-1 NLRC4	Sample 10	UNKNOWN	SYBR	None	30.955	31.4861	0.543764				TRUE	167874	TRUE	3	21	84.0435			Y	N
H10	5800-1 NLRC4	Sample 10	UNKNOWN	SYBR	None	32.0417	31.4861	0.543764				TRUE	167874	TRUE	3	22	84.0435			Y	N
H12	5800-1 NLRC4	Sample 10	UNKNOWN	SYBR	None	31.4616	31.4861	0.543764				TRUE	167874	TRUE	3	24	84.0435			Y	N
D2	5800 ACTB	Sample 2	UNKNOWN	SYBR	None	23.3803	23.4068	0.0447966				TRUE	188928	TRUE	3	15	80.3107			N	N
E2	5800 ACTB	Sample 2	UNKNOWN	SYBR	None	23.3816	23.4068	0.0447966				TRUE	188928	TRUE	3	15	80.3107			N	N
F2	5800 ACTB	Sample 2	UNKNOWN	SYBR	None	23.4585	23.4068	0.0447966				TRUE	188928	TRUE	3	15	80.0618			N	N
E11	5800-1 NLRC4	Sample 2	UNKNOWN	SYBR	None	31.5497	31.3441	0.424974				TRUE	167874	TRUE	3	16	84.2924			N	N
G2	5800-1 NLRC4	Sample 2	UNKNOWN	SYBR	None	30.8554	31.3441	0.424974				TRUE	167874	TRUE	3	20	84.2924			N	N
H2	5800-1 NLRC4	Sample 2	UNKNOWN	SYBR	None	31.6271	31.3441	0.424974				TRUE	167874	TRUE	3	23	84.0435			N	N
D3	5800 ACTB	Sample 3	UNKNOWN	SYBR	None	22.6001	22.5357	0.0563626				TRUE	188928	TRUE	3	15	80.5595			N	N
E3	5800 ACTB	Sample 3	UNKNOWN	SYBR	None	22.5121	22.5357	0.0563626				TRUE	188928	TRUE	3	15	80.5595			N	N
F3	5800 ACTB	Sample 3	UNKNOWN	SYBR	None	22.4951	22.5357	0.0563626				TRUE	188928	TRUE	3	15	80.3107			N	N
F11	5800-1 NLRC4	Sample 3	UNKNOWN	SYBR	None	33.7198	32.992	0.695667				TRUE	167874	TRUE	3	23	84.2924			Y	N
G3	5800-1 NLRC4	Sample 3	UNKNOWN	SYBR	None	32.3337	32.992	0.695667				TRUE	167874	TRUE	3	23	84.2924			Y	N
H3	5800-1 NLRC4	Sample 3	UNKNOWN	SYBR	None	32.9225	32.992	0.695667				TRUE	167874	TRUE	3	22	84.2924			Y	N
D4	5800 ACTB	Sample 4	UNKNOWN	SYBR	None	24.433	24.398	0.052708				TRUE	188928	TRUE	3	11	80.3107			N	N
E4	5800 ACTB	Sample 4	UNKNOWN	SYBR	None	24.4237	24.398	0.052708				TRUE	188928	TRUE	3	11	80.3107			N	N
F4	5800 ACTB	Sample 4	UNKNOWN	SYBR	None	24.3374	24.398	0.052708				TRUE	188928	TRUE	3	15	80.3107			N	N
G4	5800-1 NLRC4	Sample 4	UNKNOWN	SYBR	None	32.9319	32.5479	0.344123				TRUE	167874	TRUE	3	22	84.2924			N	N
G11	5800-1 NLRC4	Sample 4	UNKNOWN	SYBR	None	32.4446	32.5479	0.344123				TRUE	167874	TRUE	3	22	84.0435			N	N
H4	5800-1 NLRC4	Sample 4	UNKNOWN	SYBR	None	32.2674	32.5479	0.344123				TRUE	167874	TRUE	3	23	84.0435			N	N
D5	5800 ACTB	Sample 5	UNKNOWN	SYBR	None	24.9292	24.7992	0.119181				TRUE	188928	TRUE	3	15	80.5595			N	N
E5	5800 ACTB	Sample 5	UNKNOWN	SYBR	None	24.7735	24.7992	0.119181				TRUE	188928	TRUE	3	15	80.5595			N	N
F5	5800 ACTB	Sample 5	UNKNOWN	SYBR	None	24.695	24.7992	0.119181				TRUE	188928	TRUE	3	14	80.5595			N	N
G5	5800-1 NLRC4	Sample 5	UNKNOWN	SYBR	None	30.6455	30.5808	0.143364				TRUE	167874	TRUE	3	20	84.5412			N	N
H5	5800-1 NLRC4	Sample 5	UNKNOWN	SYBR	None	30.4164	30.5808	0.143364				TRUE	167874	TRUE	3	21	84.2924			N	N
H11	5800-1 NLRC4	Sample 5	UNKNOWN	SYBR	None	30.6803	30.5808	0.143364				TRUE	167874	TRUE	3	21	84.0435			N	N
D6	5800 ACTB	Sample 6	UNKNOWN	SYBR	None	21.862	21.7144	0.188594				TRUE	188928	TRUE	3	11	80.5595			N	N
E6	5800 ACTB	Sample 6	UNKNOWN	SYBR	None	21.7793	21.7144	0.188594				TRUE	188928	TRUE	3	15	80.5595			N	N
F6	5800 ACTB	Sample 6	UNKNOWN	SYBR	None	21.5019	21.7144	0.188594				TRUE	188928	TRUE	3	15	80.5595			N	N
D12	5800-1 NLRC4	Sample 6	UNKNOWN	SYBR	None	29.7269	29.8888	0.147205				TRUE	167874	TRUE	3	19	84.0435			N	N
G6	5800-1 NLRC4	Sample 6	UNKNOWN	SYBR	None	30.0145	29.8888	0.147205				TRUE	167874	TRUE	3	19	84.5412			N	N
H6	5800-1 NLRC4	Sample 6	UNKNOWN	SYBR	None	29.9252	29.8888	0.147205				TRUE	167874	TRUE	3	21	84.2924			N	N
D7	5800 ACTB	Sample 7	UNKNOWN	SYBR	None	21.3344	21.2443	0.112599				TRUE	188928	TRUE	3	10	80.3107			N	N
E7	5800 ACTB	Sample 7	UNKNOWN	SYBR	None	21.2805	21.2443	0.112599				TRUE	188928	TRUE	3	15	80.5595			N	N
F7	5800 ACTB	Sample 7	UNKNOWN	SYBR	None	21.1181	21.2443	0.112599				TRUE	188928	TRUE	3	15	80.5595			N	N
E12	5800-1 NLRC4	Sample 7	UNKNOWN	SYBR	None	31.1418	31.0227	0.173154				TRUE	167874	TRUE	3	20	84.0435			N	N
G7	5800-1 NLRC4	Sample 7	UNKNOWN	SYBR	None	31.1024	31.0227	0.173154				TRUE	167874	TRUE	3	20	84.5412			N	N
H7	5800-1 NLRC4	Sample 7	UNKNOWN	SYBR	None	30.8241	31.0227	0.173154				TRUE	167874	TRUE	3	19	84.2924			N	N
D8	5800 ACTB	Sample 8	UNKNOWN	SYBR	None	22.7463	22.59	0.13556				TRUE	188928	TRUE	3	10	80.5595			N	N
E8	5800 ACTB	Sample 8	UNKNOWN	SYBR	None	22.5043	22.59	0.13556				TRUE	188928	TRUE	3	11	80.5595			N	N
F8	5800 ACTB	Sample 8	UNKNOWN	SYBR	None	22.5194	22.59	0.13556				TRUE	188928	TRUE	3	15	80.3107			N	N
F12	5800-1 NLRC4	Sample 8	UNKNOWN	SYBR	None	33.6943	34.0139	0.384558				TRUE	167874	TRUE	3	23	84.0435			N	N
G8	5800-1 NLRC4	Sample 8	UNKNOWN	SYBR	None	33.9068	34.0139	0.384558				TRUE	167874	TRUE	3	24	84.2924			N	N
H8	5800-1 NLRC4	Sample 8	UNKNOWN	SYBR	None	34.4407	34.0139	0.384558				TRUE	167874	TRUE	3	23	84.0435			N	N
D9	5800 ACTB	Sample 9	UNKNOWN	SYBR	None	20.7244	20.7155	0.0119486				TRUE	188928	TRUE	3	15	80.3107			N	N
E9	5800 ACTB	Sample 9	UNKNOWN	SYBR	None	20.7202	20.7155	0.0119486				TRUE	188928	TRUE	3	15	80.3107			N	N
F9	5800 ACTB	Sample 9	UNKNOWN	SYBR	None	20.7019	20.7155	0.0119486				TRUE	188928	TRUE	3	15	80.3107			N	N
G9	5800-1 NLRC4	Sample 9	UNKNOWN	SYBR	None	30.1303	30.0323	0.27157				TRUE	167874	TRUE	3	19	84.2924			N	N
G12	5800-1 NLRC4	Sample 9	UNKNOWN	SYBR	None	30.2412	30.0323	0.27157				TRUE	167874	TRUE	3	20	84.0435			N	N
H9	5800-1 NLRC4	Sample 9	UNKNOWN	SYBR	None	29.7253	30.0323	0.27157				TRUE	167874	TRUE	3	21	84.2924			N	N
A1																				Y	N
A2																				Y	N
A3																				Y	N
A4																				Y	N
A5																				Y	N
A6																				Y	N
A7																				Y	N
A8																				N	N
A9																				N	N
A10																				N	N
A11																				Y	N
A12																				Y	N
B1																				Y	N
B2																				Y	N
B3																				Y	N
B4																				Y	N
B5																				Y	N
B6																				Y	N
B7																				Y	N
B8																				N	N
B9																				N	N
B10																				N	N
B11																				Y	N
B12																				Y	N
C1																				Y	N
C2																				Y	N
C3																				Y	N
C4																				Y	N
C5																				Y	N
C6																				Y	N
C7																				Y	N
C8																				N	N
C9																				N	N
C10																				N	N
C11																				Y	N
C12																				Y	N

## Sheet: Sheet2
Block Type	96alum
Chemistry	SYBR_GREEN
Experiment File Name	C:\Users\fangyalan\Desktop\1111\5800x23 5788x9 Y5749 Y5782.eds
Instrument Type	sds7500
Passive Reference
Well	Target Name	Sample Name	Task	Reporter	Quencher	Cт	Cт Mean	Cт SD	Quantity	Quantity Mean	Quantity SD	Automatic Ct Threshold	Ct Threshold	Automatic Baseline	Baseline Start	Baseline End	Tm1	Tm2	Comments	HIGHSD	OUTLIERRG	MTP
A1	5800-2 S100A9	Sample 1	UNKNOWN	SYBR	None	29.819	29.8475	0.135844				TRUE	171654	TRUE	3	17	87.5092			N	N	N
B1	5800-2 S100A9	Sample 1	UNKNOWN	SYBR	None	29.7281	29.8475	0.135844				TRUE	171654	TRUE	3	20	87.7588			N	N	N
C1	5800-2 S100A9	Sample 1	UNKNOWN	SYBR	None	29.9953	29.8475	0.135844				TRUE	171654	TRUE	3	17	88.0084			N	N	N
D1	5800-3 TXN	Sample 1	UNKNOWN	SYBR	None	32.6996	33.0725	0.324058				TRUE	189348	TRUE	3	22	82.2672			N	N	N
E1	5800-3 TXN	Sample 1	UNKNOWN	SYBR	None	33.2857	33.0725	0.324058				TRUE	189348	TRUE	3	21	82.2672			N	N	N
F1	5800-3 TXN	Sample 1	UNKNOWN	SYBR	None	33.2322	33.0725	0.324058				TRUE	189348	TRUE	3	21	82.2672			N	N	N
A10	5800-2 S100A9	Sample 10	UNKNOWN	SYBR	None	25.1828	25.004	0.155537				TRUE	171654	TRUE	3	16	87.5092			N	N	N
B10	5800-2 S100A9	Sample 10	UNKNOWN	SYBR	None	24.9296	25.004	0.155537				TRUE	171654	TRUE	3	16	87.5092			N	N	N
C10	5800-2 S100A9	Sample 10	UNKNOWN	SYBR	None	24.8996	25.004	0.155537				TRUE	171654	TRUE	3	14	87.7588			N	N	N
D10	5800-3 TXN	Sample 10	UNKNOWN	SYBR	None	27.619	27.7448	0.131777				TRUE	189348	TRUE	3	18	82.2672			N	N	N
E10	5800-3 TXN	Sample 10	UNKNOWN	SYBR	None	27.7336	27.7448	0.131777				TRUE	189348	TRUE	3	18	82.2672			N	N	N
F10	5800-3 TXN	Sample 10	UNKNOWN	SYBR	None	27.8819	27.7448	0.131777				TRUE	189348	TRUE	3	17	82.2672			N	N	N
A2	5800-2 S100A9	Sample 2	UNKNOWN	SYBR	None	23.9567	23.9329	0.0299818				TRUE	171654	TRUE	3	16	87.7588			N	N	N
B2	5800-2 S100A9	Sample 2	UNKNOWN	SYBR	None	23.9428	23.9329	0.0299818				TRUE	171654	TRUE	3	16	87.7588			N	N	N
C2	5800-2 S100A9	Sample 2	UNKNOWN	SYBR	None	23.8992	23.9329	0.0299818				TRUE	171654	TRUE	3	16	88.0084			N	N	N
D2	5800-3 TXN	Sample 2	UNKNOWN	SYBR	None	29.7814	29.7066	0.0998185				TRUE	189348	TRUE	3	18	82.5168			N	N	N
E2	5800-3 TXN	Sample 2	UNKNOWN	SYBR	None	29.5933	29.7066	0.0998185				TRUE	189348	TRUE	3	17	82.5168			N	N	N
F2	5800-3 TXN	Sample 2	UNKNOWN	SYBR	None	29.7452	29.7066	0.0998185				TRUE	189348	TRUE	3	18	82.2672			N	N	N
A3	5800-2 S100A9	Sample 3	UNKNOWN	SYBR	None	22.9958	23.0583	0.078486				TRUE	171654	TRUE	3	16	87.7588			N	N	N
B3	5800-2 S100A9	Sample 3	UNKNOWN	SYBR	None	23.1464	23.0583	0.078486				TRUE	171654	TRUE	3	16	87.7588			N	N	N
C3	5800-2 S100A9	Sample 3	UNKNOWN	SYBR	None	23.0326	23.0583	0.078486				TRUE	171654	TRUE	3	16	88.0084			N	N	N
D3	5800-3 TXN	Sample 3	UNKNOWN	SYBR	None	28.9361	28.9791	0.0478718				TRUE	189348	TRUE	3	18	82.5168			N	N	N
E3	5800-3 TXN	Sample 3	UNKNOWN	SYBR	None	29.0307	28.9791	0.0478718				TRUE	189348	TRUE	3	18	82.5168			N	N	N
F3	5800-3 TXN	Sample 3	UNKNOWN	SYBR	None	28.9704	28.9791	0.0478718				TRUE	189348	TRUE	3	19	82.5168			N	N	N
A4	5800-2 S100A9	Sample 4	UNKNOWN	SYBR	None	25.221	25.1754	0.0491886				TRUE	171654	TRUE	3	16	87.7588			N	N	N
B4	5800-2 S100A9	Sample 4	UNKNOWN	SYBR	None	25.1233	25.1754	0.0491886				TRUE	171654	TRUE	3	14	87.7588			N	N	N
C4	5800-2 S100A9	Sample 4	UNKNOWN	SYBR	None	25.1819	25.1754	0.0491886				TRUE	171654	TRUE	3	16	88.0084			N	N	N
D4	5800-3 TXN	Sample 4	UNKNOWN	SYBR	None	30.1415	30.0493	0.121632				TRUE	189348	TRUE	3	19	82.5168			N	N	N
E4	5800-3 TXN	Sample 4	UNKNOWN	SYBR	None	30.095	30.0493	0.121632				TRUE	189348	TRUE	3	19	82.5168			N	N	N
F4	5800-3 TXN	Sample 4	UNKNOWN	SYBR	None	29.9114	30.0493	0.121632				TRUE	189348	TRUE	3	21	82.5168			N	N	N
A5	5800-2 S100A9	Sample 5	UNKNOWN	SYBR	None	26.0601	26.1006	0.0505205				TRUE	171654	TRUE	3	16	87.7588			N	N	N
B5	5800-2 S100A9	Sample 5	UNKNOWN	SYBR	None	26.0844	26.1006	0.0505205				TRUE	171654	TRUE	3	16	88.0084			N	N	N
C5	5800-2 S100A9	Sample 5	UNKNOWN	SYBR	None	26.1572	26.1006	0.0505205				TRUE	171654	TRUE	3	16	88.0084			N	N	N
D5	5800-3 TXN	Sample 5	UNKNOWN	SYBR	None	30.8422	30.9773	0.253307				TRUE	189348	TRUE	3	21	82.5168			N	N	N
E5	5800-3 TXN	Sample 5	UNKNOWN	SYBR	None	31.2695	30.9773	0.253307				TRUE	189348	TRUE	3	21	82.5168			N	N	N
F5	5800-3 TXN	Sample 5	UNKNOWN	SYBR	None	30.8201	30.9773	0.253307				TRUE	189348	TRUE	3	19	82.5168			N	N	N
A6	5800-2 S100A9	Sample 6	UNKNOWN	SYBR	None	26.8038	26.837	0.0297976				TRUE	171654	TRUE	3	16	87.7588			N	N	N
B6	5800-2 S100A9	Sample 6	UNKNOWN	SYBR	None	26.846	26.837	0.0297976				TRUE	171654	TRUE	3	16	87.7588			N	N	N
C6	5800-2 S100A9	Sample 6	UNKNOWN	SYBR	None	26.8613	26.837	0.0297976				TRUE	171654	TRUE	3	16	88.0084			N	N	N
D6	5800-3 TXN	Sample 6	UNKNOWN	SYBR	None	29.2214	29.2688	0.0506039				TRUE	189348	TRUE	3	18	82.5168			N	N	N
E6	5800-3 TXN	Sample 6	UNKNOWN	SYBR	None	29.3221	29.2688	0.0506039				TRUE	189348	TRUE	3	18	82.5168			N	N	N
F6	5800-3 TXN	Sample 6	UNKNOWN	SYBR	None	29.263	29.2688	0.0506039				TRUE	189348	TRUE	3	18	82.5168			N	N	N
A7	5800-2 S100A9	Sample 7	UNKNOWN	SYBR	None	27.0622	27.0693	0.0655155				TRUE	171654	TRUE	3	17	87.7588			N	N	N
B7	5800-2 S100A9	Sample 7	UNKNOWN	SYBR	None	27.0076	27.0693	0.0655155				TRUE	171654	TRUE	3	17	87.7588			N	N	N
C7	5800-2 S100A9	Sample 7	UNKNOWN	SYBR	None	27.1381	27.0693	0.0655155				TRUE	171654	TRUE	3	16	88.0084			N	N	N
D7	5800-3 TXN	Sample 7	UNKNOWN	SYBR	None	28.6607	28.7354	0.0953273				TRUE	189348	TRUE	3	19	82.5168			N	N	N
E7	5800-3 TXN	Sample 7	UNKNOWN	SYBR	None	28.7028	28.7354	0.0953273				TRUE	189348	TRUE	3	17	82.5168			N	N	N
F7	5800-3 TXN	Sample 7	UNKNOWN	SYBR	None	28.8428	28.7354	0.0953273				TRUE	189348	TRUE	3	18	82.5168			N	N	N
A8	5800-2 S100A9	Sample 8	UNKNOWN	SYBR	None	25.21	25.1906	0.0989057				TRUE	171654	TRUE	3	16	87.7588			N	N	N
B8	5800-2 S100A9	Sample 8	UNKNOWN	SYBR	None	25.0834	25.1906	0.0989057				TRUE	171654	TRUE	3	16	87.7588			N	N	N
C8	5800-2 S100A9	Sample 8	UNKNOWN	SYBR	None	25.2784	25.1906	0.0989057				TRUE	171654	TRUE	3	16	88.0084			N	N	N
D8	5800-3 TXN	Sample 8	UNKNOWN	SYBR	None	29.568	29.5283	0.111562				TRUE	189348	TRUE	3	18	82.5168			N	N	N
E8	5800-3 TXN	Sample 8	UNKNOWN	SYBR	None	29.6146	29.5283	0.111562				TRUE	189348	TRUE	3	19	82.5168			N	N	N
F8	5800-3 TXN	Sample 8	UNKNOWN	SYBR	None	29.4023	29.5283	0.111562				TRUE	189348	TRUE	3	19	82.5168			N	N	N
A9	5800-2 S100A9	Sample 9	UNKNOWN	SYBR	None	26.7986	26.4657	0.289978				TRUE	171654	TRUE	3	16	87.5092			N	N	N
B9	5800-2 S100A9	Sample 9	UNKNOWN	SYBR	None	26.2677	26.4657	0.289978				TRUE	171654	TRUE	3	16	87.7588			N	N	N
C9	5800-2 S100A9	Sample 9	UNKNOWN	SYBR	None	26.331	26.4657	0.289978				TRUE	171654	TRUE	3	17	87.7588			N	N	N
D9	5800-3 TXN	Sample 9	UNKNOWN	SYBR	None	27.8553	27.8914	0.0363045				TRUE	189348	TRUE	3	18	82.5168			N	N	N
E9	5800-3 TXN	Sample 9	UNKNOWN	SYBR	None	27.9279	27.8914	0.0363045				TRUE	189348	TRUE	3	17	82.5168			N	N	N
F9	5800-3 TXN	Sample 9	UNKNOWN	SYBR	None	27.891	27.8914	0.0363045				TRUE	189348	TRUE	3	18	82.2672			N	N	N
A11																				N	N	N
A12																				N	N	N
B11																				N	N	N
B12																				N	N	N
C11																				N	N	N
C12																				N	N	N
D11																				Y	N	N
D12																				Y	N	N
E11																				Y	N	N
E12																				Y	N	N
F11																				Y	N	N
F12																				Y	N	N
G1																				Y	Y	N
G2																				Y	Y	N
G3																				Y	N	N
G4																				Y	N	N
G5																				Y	N	N
G6																				Y	N	N
G7																				Y	N	Y
G8																				Y	N	Y
G9																				Y	N	N
G10																				Y	N	N
G11																				Y	N	N
G12																				Y	N	N
H1																				Y	N	N
H2																				Y	N	Y
H3																				Y	N	N
H4																				Y	N	N
H5																				Y	N	Y
H6																				Y	N	Y
H7																				Y	N	N
H8																				Y	N	N
H9																				Y	N	N
H10																				Y	N	N
H11																				Y	N	Y
H12																				Y	N	Y

## Sheet: Sheet3
Block Type	384-Well Block
Calibration Background is expired	No
Calibration Background performed on	01-14-2025
Calibration Pure Dye ABY is expired	No
Calibration Pure Dye ABY performed on	01-14-2025
Calibration Pure Dye CY5 is expired	No
Calibration Pure Dye CY5 performed on	01-14-2025
Calibration Pure Dye FAM is expired	No
Calibration Pure Dye FAM performed on	01-14-2025
Calibration Pure Dye JUN is expired	No
Calibration Pure Dye JUN performed on	01-14-2025
Calibration Pure Dye MUSTANG PURPLE is expired	No
Calibration Pure Dye MUSTANG PURPLE performed on	01-14-2025
Calibration Pure Dye NED is expired	No
Calibration Pure Dye NED performed on	01-14-2025
Calibration Pure Dye ROX is expired	No
Calibration Pure Dye ROX performed on	01-14-2025
Calibration Pure Dye SYBR is expired	No
Calibration Pure Dye SYBR performed on	01-14-2025
Calibration Pure Dye TAMRA is expired	No
Calibration Pure Dye TAMRA performed on	01-14-2025
Calibration Pure Dye VIC is expired	No
Calibration Pure Dye VIC performed on	01-14-2025
Calibration ROI is expired	No
Calibration ROI performed on	01-14-2025
Calibration Uniformity is expired	No
Calibration Uniformity performed on	01-14-2025
Chemistry	SYBR_GREEN
Date Created	01-14-2025 16:55:12 PM CST
Experiment Barcode
Experiment Comment
Experiment File Name	S:\Pan CX\20250114\sepsis.eds
Experiment Name	sepsis
Experiment Run End Time	S:\Pan CX\20250114\sepsis.eds
Experiment Type	Comparative Cт (ΔΔCт)
Instrument Name	272530907
Instrument Serial Number	272530907
Instrument Type	QuantStudio™ 5 System
Passive Reference	ROX
Post-read Stage/Step
Pre-read Stage/Step
Quantification Cycle Method	Ct
Signal Smoothing On	true
Stage where Melt Analysis is performed	Stage3
Stage/ Cycle where Ct Analysis is performed	Stage2, Step2
User Name
Well	Well Position	Omit	Sample Name	Target Name	Task	Reporter	Quencher	Quantity	Quantity Mean	Quantity SD	ddd	CT	Ct Mean	Ct SD	Delta Ct	Automatic Ct Threshold	Ct Threshold	Automatic Baseline	Baseline Start	Baseline End	Amp Status	Comments	Cq Conf	CQCONF	MTP	EXPFAIL	HIGHSD	Tm1	OUTLIERRG	Tm2
1	A1	FALSE	Sample 1	ACTB	UNKNOWN	SYBR	None				28.7456	22.9965	22.9049	0.102926		TRUE	0.109583	TRUE	3	8	Amp		0.95974	N	N	N	N	86.5179	N
2	A2	FALSE	Sample 1	ACTB	UNKNOWN	SYBR	None				28.4914	22.7931	22.9049	0.102926		TRUE	0.109583	TRUE	3	7	Amp		0.952932	N	N	N	N	86.6303	N
3	A3	FALSE	Sample 1	ACTB	UNKNOWN	SYBR	None				28.5523	22.8419	22.9049	0.102926		TRUE	0.109583	TRUE	3	7	Amp		0.977614	N	N	N	N	86.6303	N
4	A4	FALSE	Sample 1	ACTB	UNKNOWN	SYBR	None				28.7351	22.9881	22.9049	0.102926		TRUE	0.109583	TRUE	3	8	Amp		0.959994	N	N	N	N	86.6303	N
5	A5	FALSE	Sample 1	NLRC4	UNKNOWN	SYBR	None				36.6008	31.1107	30.6171	0.478974		TRUE	0.17549	TRUE	3	18	Amp		0.945143	N	Y	N	Y	80.397	Y	76.1384
6	A6	FALSE	Sample 1	NLRC4	UNKNOWN	SYBR	None				35.662	30.3127	30.6171	0.535324		TRUE	0.17549	TRUE	3	26	Amp		0.85264	N	N	N	Y	83.647	N
7	A7	FALSE	Sample 1	NLRC4	UNKNOWN	SYBR	None				35.428	30.1138	30.6171	0.535324		TRUE	0.17549	TRUE	3	24	Amp		0.848508	N	N	N	Y	83.647	N
8	A8	FALSE	Sample 1	NLRC4	UNKNOWN	SYBR	None				36.3897	30.9312	30.6171	0.535324		TRUE	0.17549	TRUE	3	25	Amp		0.840721	N	N	N	Y	83.647	N
9	A9	FALSE	Sample 1	S100A9	UNKNOWN	SYBR	None				29.819	25.3462	25.3462	0		TRUE	0.210849	TRUE	3	26	Amp		0.906483	N	Y	N	Y	79.6406	N	75.4881
10	A10	FALSE	Sample 1	S100A9	UNKNOWN	SYBR	None				29.7281	25.3462	25.3462	0.10705		TRUE	0.210849	TRUE	3	27	Amp		0.820514	N	Y	N	Y	79.5283	N	83.0074
11	A11	FALSE	Sample 1	S100A9	UNKNOWN	SYBR	None				29.9953	25.3462	25.3462	0.10705		TRUE	0.210849	TRUE	3	26	Amp		0.825672	N	N	N	Y	79.6406	N
12	A12	FALSE	Sample 1	S100A9	UNKNOWN	SYBR	None				29.8077	25.3462	25.3462	0.10705		TRUE	0.210849	TRUE	3	26	Amp		0.814216	N	N	N	Y	79.6406	N
13	A13	FALSE	Sample 1	TXN	UNKNOWN	SYBR	None				32.6996	27.7946	28.1455	0.234869		TRUE	0.296339	TRUE	3	28	Amp		0.866458	N	Y	N	Y	86.2987	N	78.8814
14	A14	FALSE	Sample 1	TXN	UNKNOWN	SYBR	None				33.2857	28.2929	28.1455	0.262501		TRUE	0.296339	TRUE	3	25	Amp		0.858085	N	Y	N	Y	85.2873	N	81.0167
15	A15	FALSE	Sample 1	TXN	UNKNOWN	SYBR	None				33.2322	28.2473	28.1455	0.262501		TRUE	0.296339	TRUE	3	29	Amp		0.870155	N	N	N	Y	83.3767	N
16	A16	FALSE	Sample 1	TXN	UNKNOWN	SYBR	None				33.2318	28.247	28.1455	0.262501		TRUE	0.296339	TRUE	3	30	Amp		0.857463	N	Y	N	Y	83.3767	N	78.6566
17	A17
18	A18
19	A19
20	A20
25	B1	FALSE	Sample 2	ACTB	UNKNOWN	SYBR	None				23.2696	26.7601	26.8784	0.0893985		TRUE	0.109583	TRUE	3	8	Amp		0.950646	N	N	N	N	86.6303	N
26	B2	FALSE	Sample 2	ACTB	UNKNOWN	SYBR	None				23.3803	26.8873	26.8784	0.0893985		TRUE	0.109583	TRUE	3	8	Amp		0.950646	N	N	N	N	86.6303	N
27	B3	FALSE	Sample 2	ACTB	UNKNOWN	SYBR	None				23.3816	26.8889	26.8784	0.0893985		TRUE	0.109583	TRUE	3	9	Amp		0.927709	N	N	N	N	86.6303	N
28	B4	FALSE	Sample 2	ACTB	UNKNOWN	SYBR	None				23.4585	26.9773	26.8784	0.0893985		TRUE	0.109583	TRUE	3	8	Amp		0.968384	N	N	N	N	86.7427	N
29	B5	FALSE	Sample 2	NLRC4	UNKNOWN	SYBR	None				31.5497	34.7047	34.3509	0.459046		TRUE	0.17549	TRUE	3	24	Amp		0.802941	N	N	N	Y	83.647	N
30	B6	FALSE	Sample 2	NLRC4	UNKNOWN	SYBR	None				30.8554	33.9409	34.3509	0.459046		TRUE	0.17549	TRUE	3	22	Amp		0.801602	N	N	N	Y	83.535	N
31	B7	FALSE	Sample 2	NLRC4	UNKNOWN	SYBR	None				31.6271	34.7898	34.3509	0.459046		TRUE	0.17549	TRUE	3	24	Amp		0.815476	N	N	N	Y	83.7591	N
32	B8	FALSE	Sample 2	NLRC4	UNKNOWN	SYBR	None				30.8804	33.9684	34.3509	0.459046		TRUE	0.17549	TRUE	3	23	Amp		0.817423	N	Y	N	Y	83.535	N	76.1384
33	B9	FALSE	Sample 2	S100A9	UNKNOWN	SYBR	None				23.9567	27.5502	27.5253	0.351687		TRUE	0.210849	TRUE	3	27	Amp		0.824217	N	N	N	N	79.865	N
34	B10	FALSE	Sample 2	S100A9	UNKNOWN	SYBR	None				23.9428	27.5342	27.5253	0.351687		TRUE	0.210849	TRUE	3	26	Amp		0.800022	N	N	N	N	79.6406	N
35	B11	FALSE	Sample 2	S100A9	UNKNOWN	SYBR	None				23.8992	27.4841	27.5253	0.351687		TRUE	0.210849	TRUE	3	27	Amp		0.806913	N	N	N	N	79.7528	N
36	B12	FALSE	Sample 2	S100A9	UNKNOWN	SYBR	None				23.9415	27.5327	27.5253	0.351687		TRUE	0.210849	TRUE	3	27	Amp		0.809737	N	N	N	N	79.7528	N
37	B13	FALSE	Sample 2	TXN	UNKNOWN	SYBR	None				29.7814	30.377	30.2717	0.101372		TRUE	0.296339	TRUE	3	31	Amp		0.82877	N	N	N	Y	81.691	N
38	B14	FALSE	Sample 2	TXN	UNKNOWN	SYBR	None				29.5933	30.1851	30.2717	0.101372		TRUE	0.296339	TRUE	3	30	Amp		0.83947	N	Y	N	Y	81.691	N	76.6337
39	B15	FALSE	Sample 2	TXN	UNKNOWN	SYBR	None				29.7452	30.3401	30.2717	0.101372		TRUE	0.296339	TRUE	3	29	Amp		0.840479	N	N	N	Y	81.5786	N
40	B16	FALSE	Sample 2	TXN	UNKNOWN	SYBR	None				29.5929	30.1847	30.2717	0.101372		TRUE	0.296339	TRUE	3	27	Amp		0.827556	N	Y	N	Y	81.4662	N	77.1956
41	B17
42	B18
43	B19
44	B20
49	C1	FALSE	Sample 3	ACTB	UNKNOWN	SYBR	None				22.6001	25.5381	25.4583	0.0538801		TRUE	0.109583	TRUE	3	10	Amp		0.971428	N	N	N	N	86.5179	N
50	C2	FALSE	Sample 3	ACTB	UNKNOWN	SYBR	None				22.5121	25.4386	25.4583	0.0538801		TRUE	0.109583	TRUE	3	9	Amp		0.963463	N	N	N	N	86.6303	N
51	C3	FALSE	Sample 3	ACTB	UNKNOWN	SYBR	None				22.4951	25.4194	25.4583	0.0538801		TRUE	0.109583	TRUE	3	9	Amp		0.947351	N	N	N	N	86.6303	N
52	C4	FALSE	Sample 3	ACTB	UNKNOWN	SYBR	None				22.5108	25.4372	25.4583	0.0538801		TRUE	0.109583	TRUE	3	8	Amp		0.955208	N	N	N	N	86.7427	N
53	C5	FALSE	Sample 3	NLRC4	UNKNOWN	SYBR	None				33.7198	33.0455	32.5048	0.654977		TRUE	0.17549	TRUE	3	24	Amp		0.860427	N	N	N	N	83.647	N
54	C6	FALSE	Sample 3	NLRC4	UNKNOWN	SYBR	None				32.3337	31.6871	32.5048	0.654977		TRUE	0.17549	TRUE	3	23	Amp		0.850735	N	N	N	N	83.647	N
55	C7	FALSE	Sample 3	NLRC4	UNKNOWN	SYBR	None				32.9225	32.2641	32.5048	0.654977		TRUE	0.17549	TRUE	3	23	Amp		0.850717	N	N	N	N	83.7591	N
56	C8	FALSE	Sample 3	NLRC4	UNKNOWN	SYBR	None				33.6964	33.0225	32.5048	0.654977		TRUE	0.17549	TRUE	3	24	Amp		0.845582	N	N	N	N	83.7591	N
57	C9	FALSE	Sample 3	S100A9	UNKNOWN	SYBR	None				22.9958	25.9853	26.0804	0.0874611		TRUE	0.210849	TRUE	3	25	Amp		0.830244	N	N	N	Y	79.6406	N
58	C10	FALSE	Sample 3	S100A9	UNKNOWN	SYBR	None				23.1464	26.1554	26.0804	0.0874611		TRUE	0.210849	TRUE	3	21	Amp		0.950057	N	Y	N	Y	75.937	N	79.5283
59	C11	FALSE	Sample 3	S100A9	UNKNOWN	SYBR	None				23.0326	26.0268	26.0804	0.0874611		TRUE	0.210849	TRUE	3	25	Amp		0.848652	N	N	N	Y	79.6406	N
60	C12	FALSE	Sample 3	S100A9	UNKNOWN	SYBR	None				23.1451	26.1539	26.0804	0.0874611		TRUE	0.210849	TRUE	3	22	Amp		0.916163	N	N	N	Y	79.5283	N
61	C13	FALSE	Sample 3	TXN	UNKNOWN	SYBR	None				28.9361	29.5149	29.5687	0.0446284		TRUE	0.296339	TRUE	3	25	Amp		0.871162	N	Y	N	Y	85.512	N	81.0167
62	C14	FALSE	Sample 3	TXN	UNKNOWN	SYBR	None				29.0307	29.6113	29.5687	0.0446284		TRUE	0.296339	TRUE	3	27	Amp		0.839779	N	Y	N	Y	81.691	N	75.7346
63	C15	FALSE	Sample 3	TXN	UNKNOWN	SYBR	None				28.9704	29.5498	29.5687	0.0446284		TRUE	0.296339	TRUE	3	22	Amp		0.956485	N	Y	N	Y	67.4182	Y	79.2185
64	C16	FALSE	Sample 3	TXN	UNKNOWN	SYBR	None				29.0184	29.5988	29.5687	0.0446284		TRUE	0.296339	TRUE	3	26	Amp		0.857452	N	N	N	Y	81.5786	N
65	C17
66	C18
67	C19
68	C20
73	D1	FALSE	Sample 4	ACTB	UNKNOWN	SYBR	None				24.433	25.166	25.1362	0.0460291		TRUE	0.109583	TRUE	3	8	Amp		0.926185	N	N	N	N	86.5179	N
74	D2	FALSE	Sample 4	ACTB	UNKNOWN	SYBR	None				24.4237	25.1564	25.1362	0.0460291		TRUE	0.109583	TRUE	3	9	Amp		0.969681	N	N	N	N	86.6303	N
75	D3	FALSE	Sample 4	ACTB	UNKNOWN	SYBR	None				24.3374	25.0675	25.1362	0.0460291		TRUE	0.109583	TRUE	3	9	Amp		0.986027	N	N	N	N	86.6303	N
76	D4	FALSE	Sample 4	ACTB	UNKNOWN	SYBR	None				24.4221	25.1548	25.1362	0.0460291		TRUE	0.109583	TRUE	3	9	Amp		0.989082	N	N	N	N	86.6303	N
77	D5	FALSE	Sample 4	NLRC4	UNKNOWN	SYBR	None				32.9319	31.9439	31.6064	0.281348		TRUE	0.17549	TRUE	3	25	Amp		0.869891	N	N	N	N	83.647	N
78	D6	FALSE	Sample 4	NLRC4	UNKNOWN	SYBR	None				32.4446	31.4712	31.6064	0.281348		TRUE	0.17549	TRUE	3	25	Amp		0.886786	N	N	N	N	83.647	N
79	D7	FALSE	Sample 4	NLRC4	UNKNOWN	SYBR	None				32.2674	31.2993	31.6064	0.281348		TRUE	0.17549	TRUE	3	25	Amp		0.879743	N	N	N	N	83.647	N
80	D8	FALSE	Sample 4	NLRC4	UNKNOWN	SYBR	None				32.6919	31.7111	31.6064	0.281348		TRUE	0.17549	TRUE	3	26	Amp		0.872874	N	N	N	N	83.535	N
81	D9	FALSE	Sample 4	S100A9	UNKNOWN	SYBR	None				25.221	25.9777	25.9176	0.048947		TRUE	0.210849	TRUE	3	26	Amp		0.861392	N	N	N	N	79.7528	N
82	D10	FALSE	Sample 4	S100A9	UNKNOWN	SYBR	None				25.1233	25.877	25.9176	0.048947		TRUE	0.210849	TRUE	3	26	Amp		0.854646	N	N	N	N	79.7528	N
83	D11	FALSE	Sample 4	S100A9	UNKNOWN	SYBR	None				25.1819	25.9373	25.9176	0.048947		TRUE	0.210849	TRUE	3	25	Amp		0.870076	N	N	N	N	79.6406	N
84	D12	FALSE	Sample 4	S100A9	UNKNOWN	SYBR	None				25.1246	25.8783	25.9176	0.048947		TRUE	0.210849	TRUE	3	24	Amp		0.881134	N	N	N	N	79.6406	N
85	D13	FALSE	Sample 4	TXN	UNKNOWN	SYBR	None				30.1415	30.7443	30.6155	0.122826		TRUE	0.296339	TRUE	3	25	Amp		0.887597	N	N	N	N	81.691	N
86	D14	FALSE	Sample 4	TXN	UNKNOWN	SYBR	None				30.095	30.6969	30.6155	0.122826		TRUE	0.296339	TRUE	3	25	Amp		0.887922	N	N	N	N	81.5786	N
87	D15	FALSE	Sample 4	TXN	UNKNOWN	SYBR	None				29.9114	30.5097	30.6155	0.122826		TRUE	0.296339	TRUE	3	26	Amp		0.89193	N	Y	N	N	81.3538	N	86.973
88	D16	FALSE	Sample 4	TXN	UNKNOWN	SYBR	None				29.9131	30.5114	30.6155	0.122826		TRUE	0.296339	TRUE	3	25	Amp		0.886494	N	N	N	N	81.5786	N
89	D17
90	D18
91	D19
92	D20
97	E1	FALSE	Sample 5	ACTB	UNKNOWN	SYBR	None				24.9292	21.4391	21.2339	0.204667		TRUE	0.109583	TRUE	3	9	Amp		0.924511	N	N	N	Y	86.5179	N
98	E2	FALSE	Sample 5	ACTB	UNKNOWN	SYBR	None				24.7735	21.3052	21.2339	0.204667		TRUE	0.109583	TRUE	3	9	Amp		0.966968	N	N	N	Y	86.6303	N
99	E3	FALSE	Sample 5	ACTB	UNKNOWN	SYBR	None				24.695	21.2377	21.2339	0.204667		TRUE	0.109583	TRUE	3	8	Amp		0.952598	N	N	N	Y	86.6303	N
100	E4	FALSE	Sample 5	ACTB	UNKNOWN	SYBR	None				24.3649	20.9538	21.2339	0.204667		TRUE	0.109583	TRUE	3	8	Amp		0.946438	N	N	N	Y	86.6303	N
101	E5	FALSE	Sample 5	NLRC4	UNKNOWN	SYBR	None				30.6455	31.2585	31.1579	0.137819		TRUE	0.17549	TRUE	3	33	Amp		0.849464	N	N	N	Y	83.535	N
102	E6	FALSE	Sample 5	NLRC4	UNKNOWN	SYBR	None				30.4164	31.0248	31.1579	0.137819		TRUE	0.17549	TRUE	3	40	No Amp		0	Y	N	N	N	60.0005	N
103	E7	FALSE	Sample 5	NLRC4	UNKNOWN	SYBR	None				30.6803	31.2939	31.1579	0.137819		TRUE	0.17549	TRUE	3	29	Amp		0.864802	N	N	N	Y	83.647	N
104	E8	FALSE	Sample 5	NLRC4	UNKNOWN	SYBR	None				30.4458	31.0547	31.1579	0.137819		TRUE	0.17549	TRUE	3	30	Amp		0.864002	N	N	N	Y	83.647	N
105	E9	FALSE	Sample 5	S100A9	UNKNOWN	SYBR	None				26.0601	26.5813	26.5781	0.0984431		TRUE	0.210849	TRUE	3	28	Amp		0.823586	N	Y	N	N	84.0175	N	79.3039
106	E10	FALSE	Sample 5	S100A9	UNKNOWN	SYBR	None				26.0844	26.6061	26.5781	0.0984431		TRUE	0.210849	TRUE	3	27	Amp		0.844979	N	Y	N	N	83.793	N	79.4161
107	E11	FALSE	Sample 5	S100A9	UNKNOWN	SYBR	None				26.1572	26.6804	26.5781	0.0984431		TRUE	0.210849	TRUE	3	27	Amp		0.835253	N	Y	N	N	84.0175	N	79.6406
108	E12	FALSE	Sample 5	S100A9	UNKNOWN	SYBR	None				25.9261	26.4446	26.5781	0.0984431		TRUE	0.210849	TRUE	3	27	Amp		0.835643	N	N	N	N	84.0175	N
109	E13	FALSE	Sample 5	TXN	UNKNOWN	SYBR	None				30.8422	30.2254	30.426	0.244432		TRUE	0.296339	TRUE	3	25	Amp		0.868375	N	N	N	N	81.5786	N
110	E14	FALSE	Sample 5	TXN	UNKNOWN	SYBR	None				31.2695	30.6441	30.426	0.244432		TRUE	0.296339	TRUE	3	25	Amp		0.802332	N	N	N	N	81.5786	N
111	E15	FALSE	Sample 5	TXN	UNKNOWN	SYBR	None				30.8201	30.2037	30.426	0.244432		TRUE	0.296339	TRUE	3	25	Amp		0.852867	N	N	N	N	81.5786	N
112	E16	FALSE	Sample 5	TXN	UNKNOWN	SYBR	None				31.2561	30.631	30.426	0.244432		TRUE	0.296339	TRUE	3	26	Amp		0.865735	N	N	N	N	81.5786	N
113	E17
114	E18
115	E19
116	E20
121	F1	FALSE	Sample 6	ACTB	UNKNOWN	SYBR	None				21.862	22.2992	22.1832	0.171546		TRUE	0.109583	TRUE	3	9	Amp		0.971211	N	N	N	N	86.5179	N
122	F2	FALSE	Sample 6	ACTB	UNKNOWN	SYBR	None				21.7793	22.2149	22.1832	0.171546		TRUE	0.109583	TRUE	3	9	Amp		0.955192	N	N	N	N	86.6303	N
123	F3	FALSE	Sample 6	ACTB	UNKNOWN	SYBR	None				21.5019	21.932	22.1832	0.171546		TRUE	0.109583	TRUE	3	9	Amp		0.968903	N	N	N	N	86.6303	N
124	F4	FALSE	Sample 6	ACTB	UNKNOWN	SYBR	None				21.8497	22.2867	22.1832	0.171546		TRUE	0.109583	TRUE	3	8	Amp		0.953919	N	N	N	N	86.7427	N
125	F5	FALSE	Sample 6	NLRC4	UNKNOWN	SYBR	None				29.7269	30.3214	30.4991	0.125098		TRUE	0.17549	TRUE	3	30	Amp		0.871275	N	N	N	Y	83.7591	N
126	F6	FALSE	Sample 6	NLRC4	UNKNOWN	SYBR	None				30.0145	30.6147	30.4991	0.125098		TRUE	0.17549	TRUE	3	28	Amp		0.846916	N	Y	N	Y	83.535	N	75.1298
127	F7	FALSE	Sample 6	NLRC4	UNKNOWN	SYBR	None				29.9252	30.5237	30.4991	0.125098		TRUE	0.17549	TRUE	3	30	Amp		0.899938	N	N	N	Y	83.7591	N
128	F8	FALSE	Sample 6	NLRC4	UNKNOWN	SYBR	None				29.9376	30.5364	30.4991	0.125098		TRUE	0.17549	TRUE	3	30	Amp		0.86997	N	N	N	Y	83.647	N
129	F9	FALSE	Sample 6	S100A9	UNKNOWN	SYBR	None				26.8038	27.3399	27.3729	0.024877		TRUE	0.210849	TRUE	3	27	Amp		0.852324	N	Y	N	Y	79.5283	N	83.6808
130	F10	FALSE	Sample 6	S100A9	UNKNOWN	SYBR	None				26.846	27.3829	27.3729	0.024877		TRUE	0.210849	TRUE	3	27	Amp		0.86102	N	Y	N	Y	83.793	N	79.4161
131	F11	FALSE	Sample 6	S100A9	UNKNOWN	SYBR	None				26.8613	27.3986	27.3729	0.024877		TRUE	0.210849	TRUE	3	24	Amp		0.87026	N	N	N	Y	79.5283	Y
132	F12	FALSE	Sample 6	S100A9	UNKNOWN	SYBR	None				26.8336	27.3703	27.3729	0.024877		TRUE	0.210849	TRUE	3	28	Amp		0.854494	N	Y	N	Y	83.793	N	79.3039
133	F13	FALSE	Sample 6	TXN	UNKNOWN	SYBR	None				29.2214	29.8058	29.8712	0.0541624		TRUE	0.296339	TRUE	3	27	Amp		0.882393	N	N	N	N	81.691	N
134	F14	FALSE	Sample 6	TXN	UNKNOWN	SYBR	None				29.3221	29.9086	29.8712	0.0541624		TRUE	0.296339	TRUE	3	26	Amp		0.88793	N	N	N	N	81.5786	N
135	F15	FALSE	Sample 6	TXN	UNKNOWN	SYBR	None				29.263	29.8483	29.8712	0.0541624		TRUE	0.296339	TRUE	3	26	Amp		0.880345	N	N	N	N	81.5786	N
136	F16	FALSE	Sample 6	TXN	UNKNOWN	SYBR	None				29.3355	29.9223	29.8712	0.0541624		TRUE	0.296339	TRUE	3	25	Amp		0.904968	N	N	N	N	81.5786	N
137	F17
138	F18
139	F19
140	F20
145	G1	FALSE	Sample 7	ACTB	UNKNOWN	SYBR	None				21.3344	24.3212	24.2402	0.113423		TRUE	0.109583	TRUE	3	10	Amp		0.959296	N	N	N	N	86.5179	N
146	G2	FALSE	Sample 7	ACTB	UNKNOWN	SYBR	None				21.2805	24.2598	24.2402	0.113423		TRUE	0.109583	TRUE	3	10	Amp		0.973951	N	N	N	N	86.6303	N
147	G3	FALSE	Sample 7	ACTB	UNKNOWN	SYBR	None				21.1181	24.0746	24.2402	0.113423		TRUE	0.109583	TRUE	3	10	Amp		0.939735	N	N	N	N	86.6303	N
148	G4	FALSE	Sample 7	ACTB	UNKNOWN	SYBR	None				21.3204	24.3053	24.2402	0.113423		TRUE	0.109583	TRUE	3	9	Amp		0.96195	N	N	N	N	86.7427	N
149	G5	FALSE	Sample 7	NLRC4	UNKNOWN	SYBR	None				31.1418	34.2559	34.1156	0.156663		TRUE	0.17549	TRUE	3	28	Amp		0.851521	N	N	N	N	83.647	N
150	G6	FALSE	Sample 7	NLRC4	UNKNOWN	SYBR	None				31.1024	34.2126	34.1156	0.156663		TRUE	0.17549	TRUE	3	28	Amp		0.868468	N	Y	N	N	83.647	N	75.8022
151	G7	FALSE	Sample 7	NLRC4	UNKNOWN	SYBR	None				30.8241	33.9065	34.1156	0.156663		TRUE	0.17549	TRUE	3	28	Amp		0.883542	N	N	N	N	83.647	N
152	G8	FALSE	Sample 7	NLRC4	UNKNOWN	SYBR	None				30.9884	34.0872	34.1156	0.156663		TRUE	0.17549	TRUE	3	28	Amp		0.869337	N	Y	N	N	83.535	N	75.8022
153	G9	FALSE	Sample 7	S100A9	UNKNOWN	SYBR	None				27.0622	29.7685	29.7917	0.0664979		TRUE	0.210849	TRUE	3	26	Amp		0.862684	N	Y	N	N	79.5283	N	83.793
154	G10	FALSE	Sample 7	S100A9	UNKNOWN	SYBR	None				27.0076	29.7084	29.7917	0.0664979		TRUE	0.210849	TRUE	3	26	Amp		0.849522	N	Y	N	N	79.6406	N	83.793
155	G11	FALSE	Sample 7	S100A9	UNKNOWN	SYBR	None				27.1381	29.8519	29.7917	0.0664979		TRUE	0.210849	TRUE	3	26	Amp		0.840288	N	N	N	N	79.6406	N
156	G12	FALSE	Sample 7	S100A9	UNKNOWN	SYBR	None				27.1256	29.8382	29.7917	0.0664979		TRUE	0.210849	TRUE	3	25	Amp		0.856336	N	Y	N	N	79.5283	N	83.793
157	G13	FALSE	Sample 7	TXN	UNKNOWN	SYBR	None				28.6607	31.5268	31.6044	0.0861054		TRUE	0.296339	TRUE	3	24	Amp		0.87237	N	N	N	N	81.5786	N
158	G14	FALSE	Sample 7	TXN	UNKNOWN	SYBR	None				28.7028	31.5731	31.6044	0.0861054		TRUE	0.296339	TRUE	3	24	Amp		0.879764	N	N	N	N	81.5786	N
159	G15	FALSE	Sample 7	TXN	UNKNOWN	SYBR	None				28.8428	31.7271	31.6044	0.0861054		TRUE	0.296339	TRUE	3	26	Amp		0.874292	N	N	N	N	81.5786	N
160	G16	FALSE	Sample 7	TXN	UNKNOWN	SYBR	None				28.7188	31.5907	31.6044	0.0861054		TRUE	0.296339	TRUE	3	26	Amp		0.872978	N	N	N	N	81.5786	N
161	G17
162	G18
163	G19
164	G20
169	H1	FALSE	Sample 8	ACTB	UNKNOWN	SYBR	None				22.7463	25.9307	25.677	0.196868		TRUE	0.109583	TRUE	3	10	Amp		0.941557	N	N	N	N	86.4056	N
170	H2	FALSE	Sample 8	ACTB	UNKNOWN	SYBR	None				22.5043	25.6549	25.677	0.196868		TRUE	0.109583	TRUE	3	9	Amp		0.943646	N	N	N	N	86.5179	N
171	H3	FALSE	Sample 8	ACTB	UNKNOWN	SYBR	None				22.5194	25.6721	25.677	0.196868		TRUE	0.109583	TRUE	3	10	Amp		0.955755	N	N	N	N	86.5179	N
172	H4	FALSE	Sample 8	ACTB	UNKNOWN	SYBR	None				22.3249	25.4504	25.677	0.196868		TRUE	0.109583	TRUE	3	8	Amp		0.966998	N	N	N	N	86.6303	N
173	H5	FALSE	Sample 8	NLRC4	UNKNOWN	SYBR	None				33.6943	35.7159	36.1646	0.398752		TRUE	0.17549	TRUE	3	26	Amp		0.893506	N	N	N	N	83.535	N
174	H6	FALSE	Sample 8	NLRC4	UNKNOWN	SYBR	None				33.9068	35.9412	36.1646	0.398752		TRUE	0.17549	TRUE	3	25	Amp		0.944265	N	N	N	N	83.7591	N
175	H7	FALSE	Sample 8	NLRC4	UNKNOWN	SYBR	None				34.4407	36.5071	36.1646	0.398752		TRUE	0.17549	TRUE	3	26	Amp		0.892917	N	N	N	N	83.535	N
176	H8	FALSE	Sample 8	NLRC4	UNKNOWN	SYBR	None				34.4283	36.494	36.1646	0.398752		TRUE	0.17549	TRUE	3	26	Amp		0.885026	N	N	N	N	83.535	N
177	H9	FALSE	Sample 8	S100A9	UNKNOWN	SYBR	None				25.21	28.2352	28.085	0.272363		TRUE	0.210849	TRUE	3	25	Amp		0.877882	N	Y	N	Y	79.5283	N	83.6808
178	H10	FALSE	Sample 8	S100A9	UNKNOWN	SYBR	None				25.0834	28.0935	28.085	0.272363		TRUE	0.210849	TRUE	3	27	Amp		0.883045	N	Y	N	Y	79.4161	N	83.6808
179	H11	FALSE	Sample 8	S100A9	UNKNOWN	SYBR	None				25.2784	28.3118	28.085	0.272363		TRUE	0.210849	TRUE	3	22	Amp		0.901456	N	N	N	Y	75.6003	Y
180	H12	FALSE	Sample 8	S100A9	UNKNOWN	SYBR	None				24.7319	27.6997	28.085	0.272363		TRUE	0.210849	TRUE	3	26	Amp		0.882246	N	Y	N	Y	79.4161	N	83.6808
181	H13	FALSE	Sample 8	TXN	UNKNOWN	SYBR	None				29.568	31.3421	31.2858	0.100663		TRUE	0.296339	TRUE	3	22	Amp		0.909788	N	N	N	N	81.5786	N
182	H14	FALSE	Sample 8	TXN	UNKNOWN	SYBR	None				29.6146	31.3915	31.2858	0.100663		TRUE	0.296339	TRUE	3	22	Amp		0.903462	N	N	N	N	81.5786	N
183	H15	FALSE	Sample 8	TXN	UNKNOWN	SYBR	None				29.4023	31.1665	31.2858	0.100663		TRUE	0.296339	TRUE	3	22	Amp		0.906111	N	N	N	N	81.4662	N
184	H16	FALSE	Sample 8	TXN	UNKNOWN	SYBR	None				29.4746	31.2431	31.2858	0.100663		TRUE	0.296339	TRUE	3	23	Amp		0.909104	N	N	N	N	81.4662	N
185	H17
186	H18
187	H19
188	H20
193	I1	FALSE	Sample 9	ACTB	UNKNOWN	SYBR	None				20.7244	25.0765	25.0248	0.0827149		TRUE	0.109583	TRUE	3	9	Amp		0.967722	N	N	N	N	86.5179	N
194	I2	FALSE	Sample 9	ACTB	UNKNOWN	SYBR	None				20.7202	25.0714	25.0248	0.0827149		TRUE	0.109583	TRUE	3	9	Amp		0.965853	N	N	N	N	86.6303	N
195	I3	FALSE	Sample 9	ACTB	UNKNOWN	SYBR	None				20.7019	25.0493	25.0248	0.0827149		TRUE	0.109583	TRUE	3	9	Amp		0.964244	N	N	N	N	86.6303	N
196	I4	FALSE	Sample 9	ACTB	UNKNOWN	SYBR	None				20.5802	24.902	25.0248	0.0827149		TRUE	0.109583	TRUE	3	9	Amp		0.957415	N	N	N	N	86.6303	N
197	I5	FALSE	Sample 9	NLRC4	UNKNOWN	SYBR	None				30.1303	34.9512	34.8575	0.260303		TRUE	0.17549	TRUE	3	31	Amp		0.839223	N	N	N	Y	83.9832	N
198	I6	FALSE	Sample 9	NLRC4	UNKNOWN	SYBR	None				30.2412	35.0798	34.8575	0.260303		TRUE	0.17549	TRUE	3	29	Amp		0.87069	N	N	N	Y	83.535	N
199	I7	FALSE	Sample 9	NLRC4	UNKNOWN	SYBR	None				29.7253	34.4814	34.8575	0.260303		TRUE	0.17549	TRUE	3	31	Amp		0.861156	N	N	N	Y	83.535	N
200	I8	FALSE	Sample 9	NLRC4	UNKNOWN	SYBR	None				30.1012	34.9174	34.8575	0.260303		TRUE	0.17549	TRUE	3	44	No Amp		0	Y	N	Y	N	60.0005	N
201	I9	FALSE	Sample 9	S100A9	UNKNOWN	SYBR	None				26.7986	31.0863	30.6022	0.337468		TRUE	0.210849	TRUE	3	27	Amp		0.862466	N	N	N	Y	83.793	N
202	I10	FALSE	Sample 9	S100A9	UNKNOWN	SYBR	None				26.2677	30.4705	30.6022	0.337468		TRUE	0.210849	TRUE	3	28	Amp		0.835149	N	Y	N	Y	83.793	N	79.5283
203	I11	FALSE	Sample 9	S100A9	UNKNOWN	SYBR	None				26.331	30.544	30.6022	0.337468		TRUE	0.210849	TRUE	3	29	Amp		0.829877	N	Y	N	Y	83.793	N	79.3039
204	I12	FALSE	Sample 9	S100A9	UNKNOWN	SYBR	None				26.1277	30.3081	30.6022	0.337468		TRUE	0.210849	TRUE	3	19	Amp		0.949847	N	N	N	Y	75.937	Y
205	I13	FALSE	Sample 9	TXN	UNKNOWN	SYBR	None				27.8553	32.3121	32.324	0.0691724		TRUE	0.296339	TRUE	3	26	Amp		0.851554	N	N	N	Y	81.691	N
206	I14	FALSE	Sample 9	TXN	UNKNOWN	SYBR	None				27.9279	32.3964	32.324	0.0691724		TRUE	0.296339	TRUE	3	25	Amp		0.861494	N	N	N	Y	81.5786	N
207	I15	FALSE	Sample 9	TXN	UNKNOWN	SYBR	None				27.891	32.3535	32.324	0.0691724		TRUE	0.296339	TRUE	3	26	Amp		0.856924	N	N	N	Y	81.5786	N
208	I16	FALSE	Sample 9	TXN	UNKNOWN	SYBR	None				27.7879	32.234	32.324	0.0691724		TRUE	0.296339	TRUE	3	25	Amp		0.852504	N	Y	N	Y	81.4662	N	76.746
209	I17
210	I18
211	I19
212	I20
213	I21
214	I22
215	I23
216	I24
217	J1	FALSE	Sample 10	ACTB	UNKNOWN	SYBR	None				20.3191	23.1638	23.1036	0.0679425		TRUE	0.109583	TRUE	3	10	Amp		0.944647	N	N	N	N	86.5179	N
218	J2	FALSE	Sample 10	ACTB	UNKNOWN	SYBR	None				20.3135	23.1574	22.3443	0.0679425		TRUE	0.109583	TRUE	3	9	Amp		0.949166	N	N	N	N	86.6303	N
219	J3	FALSE	Sample 10	ACTB	UNKNOWN	SYBR	None				20.2345	23.0674	22.3443	0.0679425		TRUE	0.109583	TRUE	3	10	Amp		0.955082	N	N	N	N	86.6303	N
220	J4	FALSE	Sample 10	ACTB	UNKNOWN	SYBR	None				20.1983	23.026	22.3443	0.0679425		TRUE	0.109583	TRUE	3	9	Amp		0.973951	N	N	N	N	86.7427	N
221	J5	FALSE	Sample 10	NLRC4	UNKNOWN	SYBR	None				30.955	33.741	34.4399	0.540187		TRUE	0.17549	TRUE	3	29	Amp		0.872548	N	N	N	Y	83.4229	N
222	J6	FALSE	Sample 10	NLRC4	UNKNOWN	SYBR	None				32.0417	34.9255	34.4399	0.540187		TRUE	0.17549	TRUE	3	25	Amp		0.848936	N	Y	N	Y	80.0608	N	76.3625
223	J7	FALSE	Sample 10	NLRC4	UNKNOWN	SYBR	None				31.4616	34.2931	34.4399	0.540187		TRUE	0.17549	TRUE	3	30	Amp		0.875616	N	N	N	Y	83.535	N
224	J8	FALSE	Sample 10	NLRC4	UNKNOWN	SYBR	None				31.9265	34.7999	34.4399	0.540187		TRUE	0.17549	TRUE	3	26	Amp		0.854091	N	N	N	Y	83.3108	N
225	J9	FALSE	Sample 10	S100A9	UNKNOWN	SYBR	None				25.1828	27.4492	27.2027	0.172756		TRUE	0.210849	TRUE	3	27	Amp		0.848778	N	Y	N	Y	79.5283	N	83.793
226	J10	FALSE	Sample 10	S100A9	UNKNOWN	SYBR	None				24.9296	27.1733	27.2027	0.172756		TRUE	0.210849	TRUE	3	27	Amp		0.858175	N	Y	N	Y	79.4161	N	83.793
227	J11	FALSE	Sample 10	S100A9	UNKNOWN	SYBR	None				24.8996	27.1406	27.2027	0.172756		TRUE	0.210849	TRUE	3	28	Amp		0.857118	N	Y	N	Y	83.793	N	79.4161
228	J12	FALSE	Sample 10	S100A9	UNKNOWN	SYBR	None				24.8143	27.0476	27.2027	0.172756		TRUE	0.210849	TRUE	3	28	Amp		0.864619	N	Y	N	Y	83.793	N	79.4161
229	J13	FALSE	Sample 10	TXN	UNKNOWN	SYBR	None				27.619	30.1048	30.2074	0.136036		TRUE	0.296339	TRUE	3	27	Amp		0.880687	N	N	N	Y	81.5786	N
230	J14	FALSE	Sample 10	TXN	UNKNOWN	SYBR	None				27.7336	30.2296	30.2074	0.136036		TRUE	0.296339	TRUE	3	27	Amp		0.911812	N	N	N	Y	81.4662	N
231	J15	FALSE	Sample 10	TXN	UNKNOWN	SYBR	None				27.8819	30.3913	30.2074	0.136036		TRUE	0.296339	TRUE	3	28	Amp		0.890632	N	N	N	Y	81.5786	N
232	J16	FALSE	Sample 10	TXN	UNKNOWN	SYBR	None				27.6184	30.104	30.2074	0.136036		TRUE	0.296339	TRUE	3	25	Amp		0.860692	N	Y	N	Y	81.4662	Y	76.5213
